# Supplementary material for: A novel inflammatory response-related signature predicts the prognosis of skin cutaneous melanoma and the effect of anti-tumor drugs
Source: Research Square preprint supplement (doi:10.21203/rs.3.rs-1436874/v1), 2022-03-18
Supplement: Supplementary file 1 [file 40ebb6d24eb2a764e7c997b1.xlsx]

## Sheet: additional file 1
ABCA1
ABI1
ACVR1B
ACVR2A
ADM
ADORA2B
ADRM1
AHR
APLNR
AQP9
ATP2A2
ATP2B1
ATP2C1
AXL
BDKRB1
BEST1
BST2
BTG2
C3AR1
C5AR1
CALCRL
CCL17
CCL2
CCL20
CCL22
CCL24
CCL5
CCL7
CCR7
CCRL2
CD14
CD40
CD48
CD55
CD69
CD70
CD82
CDKN1A
CHST2
CLEC5A
CMKLR1
CSF1
CSF3
CSF3R
CX3CL1
CXCL10
CXCL11
CXCL6
CXCL9
CXCR6
CYBB
DCBLD2
EBI3
EDN1
EIF2AK2
EMP3
ADGRE1
EREG
F3
FFAR2
FPR1
FZD5
GABBR1
GCH1
GNA15
GNAI3
GP1BA
GPC3
GPR132
GPR183
HAS2
HBEGF
HIF1A
HPN
HRH1
ICAM1
ICAM4
ICOSLG
IFITM1
IFNAR1
IFNGR2
IL10
IL10RA
IL12B
IL15
IL15RA
IL18
IL18R1
IL18RAP
IL1A
IL1B
IL1R1
IL2RB
IL4R
IL6
IL7R
CXCL8
INHBA
IRAK2
IRF1
IRF7
ITGA5
ITGB3
ITGB8
KCNA3
KCNJ2
KCNMB2
KIF1B
KLF6
LAMP3
LCK
LCP2
LDLR
LIF
LPAR1
LTA
LY6E
LYN
MARCO
MEFV
MEP1A
MET
MMP14
MSR1
MXD1
MYC
NAMPT
NDP
NFKB1
NFKBIA
NLRP3
NMI
NMUR1
NOD2
NPFFR2
OLR1
OPRK1
OSM
OSMR
P2RX4
P2RX7
P2RY2
PCDH7
PDE4B
PDPN
PIK3R5
PLAUR
PROK2
PSEN1
PTAFR
PTGER2
PTGER4
PTGIR
PTPRE
PVR
RAF1
RASGRP1
RELA
RGS1
RGS16
RHOG
RIPK2
RNF144B
ROS1
RTP4
SCARF1
SCN1B
SELE
SELL
SELENOS
SEMA4D
SERPINE1
SGMS2
SLAMF1
SLC11A2
SLC1A2
SLC28A2
SLC31A1
SLC31A2
SLC4A4
SLC7A1
SLC7A2
SPHK1
SRI
STAB1
TACR1
TACR3
TAPBP
TIMP1
TLR1
TLR2
TLR3
TNFAIP6
TNFRSF1B
TNFRSF9
TNFSF10
TNFSF15
TNFSF9
TPBG
VIP

## Sheet: additional file 2
id	futime	fustat	BST2	C3AR1	CCL5	CD14	CXCL10	CXCL9	CYBB	EIF2AK2	EMP3	ICAM1	IL18	RTP4	SELL	SLC31A2	TIMP1
TCGA-FS-A1ZH	2.72877	1	6.82865	4.11719	6.15361	8.09288	5.60377	6.3217	5.48167	3.06898	5.9269	5.37748	2.22319	2.73391	4.32888	1.16929	11.5026
TCGA-D3-A51H	4.69589	0	6.94891	3.66635	6.81127	6.33296	5.63014	6.56923	5.84177	2.86008	6.38064	4.99917	4.72018	3.9442	8.03302	0.586463	9.58128
TCGA-EE-A2GT	3.73973	0	6.38655	3.44527	4.89364	5.35057	2.20766	3.50714	4.12209	2.19974	8.2368	6.03494	2.49379	3.05213	6.36138	0.898788	8.42118
TCGA-EE-A29Q	5.56164	1	5.15982	1.69584	2.5177	4.93707	1.25299	0.827987	2.51742	3.66208	7.36357	5.5517	0.836701	4.00249	1.48801	0.382584	8.73306
TCGA-D3-A5GO	11.4932	0	8.68157	2.79057	5.69842	6.22938	6.7912	6.66645	3.34011	3.89713	8.03302	6.09253	2.22559	5.14165	2.55662	1.4022	9.94709
TCGA-EE-A2MJ	8.01918	1	9.13588	3.87267	6.8827	6.60857	7.30032	9.28995	5.06926	3.7021	6.76632	6.7799	2.57371	4.40719	5.787	1.09508	9.24196
TCGA-EB-A44O	0.221918	0	8.79948	2.2843	2.5813	2.96451	2.71028	3.37959	1.906	3.95236	6.13897	6.60147	1.20788	2.86381	2.34482	0.978885	8.86583
TCGA-D9-A4Z2	0.520548	1	7.48764	2.1686	3.6247	5.66288	3.17569	2.90346	2.84812	3.07456	6.63706	6.05589	0.530635	3.67385	2.36731	0.0872971	10.0189
TCGA-GN-A26C	2.24932	1	9.1035	4.67191	8.34672	8.2067	6.70479	7.69856	6.08357	4.58106	6.48104	7.1935	4.03054	5.0727	3.91389	1.45868	10.2121
TCGA-D3-A8GS	9.76438	1	9.33636	2.95146	6.99253	7.0376	4.85812	5.93905	3.63349	2.94082	7.66081	5.02571	2.96136	5.02907	2.62802	0.341128	9.46385
TCGA-GN-A267	5.36986	1	8.49663	2.3519	6.16338	5.34279	5.31273	4.58055	2.90716	3.44228	7.39195	5.12415	1.85285	5.29381	2.37913	0.289768	8.72029
TCGA-EE-A20F	7.63014	0	8.37087	3.41506	5.4636	6.37098	5.53556	5.80182	4.36989	3.0805	6.95533	6.90424	2.15598	5.39163	2.63959	0.76972	9.66998
TCGA-ER-A3PL	2.76712	0	8.18702	3.65608	4.27823	5.99538	4.67611	3.87306	3.08776	3.84301	6.80269	5.06301	1.52581	4.22629	1.19769	0.60849	8.98038
TCGA-FS-A1ZN	2	1	4.96555	1.8472	2.24329	4.47279	1.86985	1.457	1.52315	3.29315	7.36357	5.26384	1.906	4.73166	2.53438	0.65744	8.90775
TCGA-RP-A694	0.0575342	0	8.24738	3.33482	4.6571	5.41392	4.75306	4.72124	2.66923	3.15974	7.54129	5.17827	2.19615	3.59276	2.05678	0.949754	7.95858
TCGA-D3-A1Q5	9.38082	1	7.82403	0.895342	3.59763	2.58681	2.35677	0.88697	0.559646	3.03026	6.79698	1.99175	0.279299	1.35047	1.99776	0.193201	12.6454
TCGA-EE-A29X	1.49315	1	7.60187	4.12412	5.97101	6.68665	3.74997	4.40627	3.99164	3.27692	6.74439	7.87492	1.67654	3.83855	3.37821	1.05789	10.1516
TCGA-DA-A1I5	11.2521	0	7.95858	4.06404	6.38655	7.23084	5.79927	7.11111	4.78505	3.36032	7.45642	5.40671	3.38522	3.41068	4.11228	1.63829	10.125
TCGA-FW-A3I3	1.45479	0	8.78625	1.81382	3.07607	4.41948	2.81046	2.05438	1.93517	3.16006	7.07004	5.3353	2.42424	4.19367	0.611062	0.190191	7.4457
TCGA-IH-A3EA	1.43562	0	8.10199	2.9542	4.55977	5.36597	1.74855	1.79913	2.38269	2.547	9.24196	6.43061	1.81238	3.70969	0.910252	0.576186	10.0977
TCGA-WE-A8JZ	2.00274	0	6.71011	1.85613	3.5499	3.4956	3.27204	4.30941	2.04568	3.37553	6.47885	5.23213	0.799782	3.35869	1.86836	0.390265	7.76948
TCGA-BF-A9VF	1.20548	0	3.07894	2.14756	3.85258	3.04801	1.16047	1.05669	0.714127	2.54277	8.83904	5.49616	2.24119	3.17537	0.270052	0.293755	7.51393
TCGA-EE-A29W	16.2521	0	4.6245	2.60738	2.6359	5.51091	0.982756	0.881394	2.98068	3.52039	5.56979	2.11552	0.849715	1.36303	0.897891	0.367426	9.07292
TCGA-Z2-AA3V	1.33151	0	9.35244	4.38273	6.72588	8.72029	3.50246	5.64537	4.30017	2.15991	8.73306	5.79068	2.51866	3.36301	4.33241	1.78521	9.41513
TCGA-D3-A3CC	7.24384	0	4.19205	3.35573	2.53106	6.07577	2.0663	1.81178	3.81075	3.3016	6.20678	4.88281	1.84246	3.61508	1.17732	0.978047	7.3828
TCGA-BF-AAP6	0.890411	0	8.68157	1.90542	4.32319	4.04726	1.92373	1.15609	1.95927	3.62644	8.26844	5.93088	0.498978	3.53141	0.529275	0.358539	9.46385
TCGA-ER-A2NH	3.46301	0	8.27939	4.84576	8.92238	7.39701	8.40832	9.18088	5.93088	3.68983	6.21025	6.76632	3.60981	4.65606	4.29931	1.6305	10.5823
TCGA-D3-A5GS	1.51507	0	5.66824	4.01039	5.37927	6.09408	6.76892	5.61228	4.17966	2.92894	7.71174	6.175	2.53617	4.8517	3.05961	1.36961	9.68833
TCGA-D3-A3C7	3.91507	0	8.8523	4.46995	6.25939	7.50859	4.33112	6.11646	5.1372	2.75142	7.0518	4.43532	3.65679	3.26584	3.21919	1.6894	12.9656
TCGA-GN-A26D	4	1	3.48784	2.55808	3.52799	4.73388	2.81385	2.11124	2.21932	2.962	8.33471	6.47669	1.31038	3.2044	2.26017	1.08394	9.1035
TCGA-EE-A3J7	5.33973	0	7.20572	2.07565	4.33649	4.398	4.0144	3.34172	2.17818	3.4231	6.83441	5.77984	0.449226	4.27519	1.82781	0.536477	6.53073
TCGA-EE-A29P	4.70137	0	9.59881	4.40079	8.65607	7.73067	9.97052	9.43193	6.06061	3.67064	7.66687	7.83865	3.60878	4.68184	4.0341	1.52005	9.15014
TCGA-EB-A51B	2.55068	0	5.64095	1.15182	4.63223	4.01559	7.74339	6.11004	1.614	3.58787	8.83904	6.31416	1.17561	4.00847	0.415861	0.277371	8.6433
TCGA-OD-A75X	24.8247	1	9.1035	2.57586	3.7319	5.33118	5.91458	3.92083	3.06492	3.53241	6.78825	6.74976	1.5006	4.61109	1.57496	0.711214	8.02433
TCGA-FR-A7U9	1.56438	0	7.25604	4.89844	6.07412	6.91388	6.04846	5.47682	5.08951	3.38822	8.33471	4.05601	2.73052	3.32068	3.39806	2.37669	10.6781
TCGA-FS-A4FC	4.53425	1	5.26622	2.42471	4.29008	5.03113	4.59588	5.0888	3.34883	3.90058	8.22683	3.03789	2.54404	4.82707	2.95672	0.754631	9.63461
TCGA-D3-A1QA	7.57534	0	8.92238	2.7785	4.29052	4.02226	4.57061	3.42446	2.74834	4.70819	7.58432	6.41843	1.18854	4.31079	2.17492	0.67101	7.77609
TCGA-D3-A8GM	8.92877	1	8.22683	2.39164	5.33285	5.54568	4.60546	5.83548	3.66457	4.76252	6.89809	5.57382	1.85648	4.87437	2.71305	1.15929	9.19635
TCGA-D3-A2JH	3.50685	0	9.18088	4.20929	9.05722	6.3217	6.94564	7.99939	5.05689	4.30941	6.71273	6.69685	3.13932	4.97573	3.98149	1.42799	7.83865
TCGA-EB-A5UN	4.90959	0	9.28995	3.6366	4.18265	4.17626	2.85336	1.9822	1.85074	3.54612	7.90441	8.24738	0.361618	4.85405	2.58711	0.93108	10.4159
TCGA-D3-A3MR	8.63288	0	8.95055	3.54135	8.70773	6.94248	6.26462	7.80995	3.84555	2.72463	7.35911	6.42653	3.94532	4.32188	4.42688	0.254808	10.0437
TCGA-FS-A1ZD	4.46027	1	3.46686	2.90129	1.4047	6.4831	0.961334	0.795989	4.01954	3.72519	7.29122	2.92864	1.10724	0.363093	0.570262	0.629425	8.75947
TCGA-ER-A42L	12.4192	0	8.98038	5.07134	7.6925	8.63045	5.33865	6.49982	5.66824	2.81105	6.87657	6.12274	3.15017	3.27888	3.55781	1.61541	9.59881
TCGA-EB-A4OZ	1.69863	0	8.65607	3.11524	7.40213	6.31795	5.62693	5.76205	3.42246	3.06898	9.1035	4.59588	4.11551	3.94	3.77338	0.489295	10.1516
TCGA-D3-A1Q4	9.33699	0	5.02638	3.50618	3.5338	5.82661	2.64297	3.91737	3.9834	3.69338	6.1342	5.3766	1.35815	1.47472	3.19472	0.56524	9.41513
TCGA-EE-A2MR	11.2	0	6.4245	5.0888	6.78548	8.07535	6.02028	6.71811	6.83719	4.18561	6.06202	5.42947	4.10421	3.31186	6.63949	1.24184	9.79936
TCGA-EE-A3AD	2.39726	1	5.8748	1.17301	2.74923	3.60981	1.75281	1.18308	0.963794	3.29609	6.61816	6.68925	0.643565	4.15954	2.16919	0.319989	9.19635
TCGA-EE-A3JH	11.1945	0	8.68157	4.79592	7.94282	7.56792	6.46603	7.74989	5.76681	3.30865	7.37821	6.70745	4.02938	4.65022	5.65532	1.7763	9.1196
TCGA-FS-A4F8	14.5699	1	7.25604	2.95795	6.19663	5.90786	5.06856	6.26645	4.79019	3.40111	6.90745	5.39422	2.9713	3.06835	6.70745	0.45861	9.4486
TCGA-ER-A2NC	3.65205	1	8.01626	4.98543	4.24821	8.98038	2.97161	1.9001	5.80426	3.35573	5.73973	5.07826	2.66443	2.28037	2.45869	0.984279	10.1516
TCGA-D9-A4Z3	1.38356	0	8.90775	3.28342	4.26576	6.16502	3.09094	2.55391	3.92083	2.76463	7.12979	5.07548	1.43269	1.06217	0.590769	1.20636	7.93477
TCGA-BF-A5EQ	0.884932	0	7.66687	2.81449	5.47682	5.94302	4.72839	5.70526	3.01272	3.21953	7.86789	6.55089	1.62969	4.69792	3.46245	0.433174	9.13588
TCGA-D3-A8GL	7.4274	1	7.80309	1.19915	1.23504	2.77019	1.05563	0.571435	1.05808	4.07656	7.35434	5.00181	0.28775	3.75647	1.28968	0.277036	6.69685
TCGA-EE-A17Y	2.26849	1	3.57092	4.59788	2.48374	4.5681	1.9557	2.1043	1.74205	3.47769	8.49663	5.03856	0.650898	2.25208	1.71982	0.443142	10.3428
TCGA-DA-A3F5	18.8301	1	7.76948	2.50951	3.54333	3.81093	1.33367	2.00677	2.73084	3.29088	6.94564	3.25089	0.785193	2.08292	2.91025	0.752623	10.8992
TCGA-BF-A5EP	0.917808	0	8.35944	2.11159	2.70503	3.89366	1.74969	1.62848	1.30676	3.21513	7.8534	5.09934	0.826876	2.97411	0.705652	0.456532	9.78044
TCGA-HR-A2OG	0.0191781	0	8.43363	3.89022	5.70068	7.30458	5.61962	6.57146	4.76927	2.9168	6.65656	7.04116	1.93605	3.26257	2.31985	0.743212	10.1814
TCGA-FS-A4FD	6.72329	1	7.6925	2.32823	4.33561	5.0549	4.82994	4.87736	3.09347	3.12534	6.21372	4.66077	1.38523	2.01281	1.10697	0.643706	6.86107
TCGA-EE-A2MK	15.0329	0	9.25821	4.15831	7.0627	8.01626	6.7799	7.36357	5.59322	3.35935	6.15361	7.82403	2.7327	4.8022	2.52257	1.07914	10.1814
TCGA-FS-A1ZC	29.7808	1	3.72411	1.70286	0.920052	4.87974	0.847488	0.479716	2.1656	3.09787	7.46649	5.47592	0.542419	0.941768	0.300012	0.609879	8.90775
TCGA-EE-A29C	6.58082	1	5.37032	2.84326	3.31153	5.70526	2.05001	2.20008	2.79762	3.2574	7.80995	5.05555	1.22357	2.39436	2.76066	1.2701	8.96526
TCGA-EB-A3XF	0.761644	0	8.77315	3.05651	4.17792	5.43506	8.54966	6.18342	4.41402	3.71689	7.21417	7.46649	2.08351	5.07409	3.16325	0.733082	9.07292
TCGA-ER-A193	2.61644	1	8.99563	3.73517	7.33606	5.75728	6.93606	8.27939	4.43254	3.90934	6.32744	6.95533	2.28675	3.82814	2.79397	1.11416	9.32097
TCGA-EE-A3AC	5.33699	0	7.33171	3.76169	5.87221	5.42125	6.74705	6.61093	4.92081	4.26748	7.52439	6.46603	2.06893	3.22917	2.74065	1.23635	8.03302
TCGA-EE-A2GB	4.93973	0	8.58981	2.75079	3.35903	4.74202	4.56664	4.6963	3.16902	3.37519	7.77609	6.10055	0.675821	3.64646	2.00075	0.547218	6.67401
TCGA-GN-A4U9	1.84384	1	7.45102	2.04926	3.19406	4.73283	4.34151	5.17606	3.43421	3.17569	5.96665	2.57287	1.21582	0.455931	1.43355	0.0983304	7.40694
TCGA-EB-A6QY	1.04658	0	3.10759	1.86598	2.80644	3.13932	2.52283	2.77699	1.54314	3.22213	6.16338	4.81538	3.45599	2.97754	0.903816	1.64925	7.64904
TCGA-BF-A1PV	0.0383562	0	7.54129	1.78792	1.60998	3.83337	1.58405	1.07338	1.74055	3.53073	8.08412	5.71205	0.631193	4.20797	1.05244	0.712832	7.55736
TCGA-BF-AAP0	1.24384	0	7.76948	3.81292	7.80309	6.67152	7.06634	7.15767	4.44705	3.27431	7.32236	6.90118	3.45599	4.20002	5.5335	0.827322	10.0977
TCGA-DA-A1IA	5.49315	1	7.34487	2.27224	4.01934	3.8671	0.631121	1.30886	1.24994	2.26833	7.28224	6.06652	0.457919	4.21777	3.54267	0.639598	8.6433
TCGA-D3-A2JP	4.96438	0	7.22281	3.53557	6.41843	7.30897	5.73736	6.36704	3.91123	2.888	7.5789	6.15361	2.65387	4.29096	2.91647	0.635064	11.0213
TCGA-EB-A5VV	0.586301	0	6.99612	2.92617	7.97478	5.64645	6.45134	7.39195	5.81307	3.08113	6.52843	5.49045	4.80049	3.2148	8.68157	0.524313	7.56792
TCGA-D3-A5GL	10.4822	0	3.65679	2.69228	3.19987	4.40034	1.57323	1.43241	1.57689	3.08335	8.35944	5.42399	1.10375	3.5955	0.540987	0.871436	9.35244
TCGA-EB-A3XD	3.17808	0	6.14382	2.92143	6.07412	6.03044	3.41456	6.25589	3.31472	2.14428	7.27786	4.83222	4.8634	2.76066	3.31841	1.9437	6.89526
TCGA-GN-A8LL	1.78082	1	9.28995	1.66265	4.13522	4.19164	0.945016	1.75501	0.570262	3.46245	7.38758	3.39708	0.634948	4.99982	1.04228	0.228444	7.21833
TCGA-FS-A1ZJ	3.94795	1	7.99123	2.12692	4.35185	4.86459	4.00924	4.74976	2.52832	3.30414	6.92644	3.36993	1.51549	2.31687	2.29938	0.569086	7.56792
TCGA-W3-A828	10.0904	1	5.19995	3.17537	4.1792	6.05292	2.93268	3.54679	4.04179	3.33221	6.25227	5.15555	1.7046	1.47107	1.88555	0.716844	9.81834
TCGA-EE-A2MQ	3.60274	1	8.39556	4.19872	3.85594	3.94961	4.01559	4.30548	2.96573	3.80116	6.04547	5.64204	1.59537	3.4238	1.91533	0.765458	10.4541
TCGA-EE-A2MH	1.4137	1	9.74223	2.85521	5.92828	6.12274	4.86164	4.86224	3.86116	3.37257	6.36515	6.0275	2.41655	4.15491	5.42032	0.568291	9.63461
TCGA-D3-A1Q9	2.63288	1	5.40409	2.95484	6.20499	5.84302	4.75194	4.10869	3.77005	3.606	7.12598	5.49913	1.45282	3.98536	2.01126	1.28741	9.28995
TCGA-DA-A1IB	3.38356	1	7.31785	4.57307	7.91921	7.24338	6.69964	8.74606	6.20161	2.96045	8.12876	6.56923	4.58463	3.72047	6.90424	1.03848	9.59881
TCGA-EE-A2MN	3.96164	1	8.31224	4.42969	6.10843	6.4956	5.43506	6.18664	4.97388	3.2383	6.73653	6.65656	2.54189	5.01643	3.39508	1.45504	7.83102
TCGA-D3-A1Q6	5.98356	1	3.49528	4.44796	3.34274	4.46563	4.46194	2.1464	3.23309	4.18052	7.64322	3.82683	0.821446	3.29481	2.02444	1.66207	11.329
TCGA-D3-A8GE	2.20274	0	6.8403	4.78622	5.7304	6.60623	7.22672	6.4245	4.58205	3.37991	5.78823	4.56265	2.14216	2.96077	2.80371	2.11433	11.1665
TCGA-EB-A24D	1.76712	0	5.75022	1.91474	4.29754	3.5068	4.06404	5.55478	2.56565	2.95703	6.31416	4.52744	1.95331	4.97388	2.22265	0.660303	6.29749
TCGA-DA-A1I1	18.5425	0	8.86583	4.03133	6.10843	6.98208	7.29577	7.42642	5.29462	3.76783	6.97555	7.8534	2.11883	4.76707	3.31029	1.20686	9.78044
TCGA-D3-A1Q1	1.38082	1	4.00328	2.18061	2.39524	5.28643	1.72751	1.39225	2.75291	3.49938	7.9666	5.74792	0.754631	1.16047	0.498646	0.311617	7.41657
TCGA-XV-A9W5	1.07397	0	8.06666	1.97178	4.56169	5.50897	4.17161	4.39939	2.56625	2.764	6.91685	4.89183	1.99444	4.30326	1.61113	0.722974	11.7185
TCGA-ER-A198	4.23014	1	8.98038	3.91737	5.44875	5.63448	5.52643	4.97513	4.67453	4.24863	7.4457	6.1455	1.73559	4.0721	2.31503	1.09038	7.94282
TCGA-D3-A51F	4.64384	0	9.51314	5.49136	10.1516	9.41513	7.33606	7.73716	6.3217	3.30289	7.98248	7.34487	5.04061	4.75139	4.67931	1.78846	10.9602
TCGA-D3-A1QB	7.97808	0	9.33636	3.87991	8.48398	7.54129	8.77315	7.77609	4.58412	4.00964	6.74439	7.31344	3.15363	4.57506	4.5593	1.43487	7.50351
TCGA-EE-A2GS	6.76712	1	9.19635	2.98632	5.33779	4.91466	6.55774	5.62171	3.55165	4.52347	9.51314	5.17827	1.20203	3.76204	3.36065	0.394086	8.9365
TCGA-EE-A2A5	3.27397	1	8.50986	3.1642	2.51986	5.4636	2.58373	2.13439	3.26094	3.3514	5.73973	4.97894	1.04503	2.94145	1.6897	0.507581	8.32373
TCGA-FS-A1Z3	1.74247	1	4.10297	2.21184	2.43166	4.75412	2.17942	3.64368	2.85943	3.6039	6.73385	4.92952	0.631193	3.89675	1.98041	0.393806	7.43608
TCGA-WE-A8ZM	8.44384	0	4.7273	1.29429	0.697911	3.94494	0.148348	0.0974617	0.907388	3.23016	6.88577	5.11837	0.178615	3.3564	1.596	0.428769	10.0977
TCGA-FR-A69P	1.30959	0	4.24052	2.55574	3.26323	5.42947	2.51896	3.6247	2.69563	3.06587	6.96522	5.58304	0.811312	1.49836	1.49277	0.429599	7.92732
TCGA-Z2-AA3S	8.08219	0	9.05722	2.49899	4.23878	5.17149	2.68582	3.42013	3.2041	3.84043	5.88271	4.0725	1.57775	3.6504	2.1329	0.387409	5.98526
TCGA-D3-A3MU	3.31233	0	8.45867	3.06898	4.47615	5.04258	4.00808	4.52999	3.44565	2.75689	7.71174	6.47235	1.51242	3.80409	2.85614	0.872945	9.59881
TCGA-EB-A5SH	4.50137	0	4.48466	1.83528	4.32626	4.94973	2.91709	3.61931	2.15598	2.55808	8.60301	4.38548	1.10253	3.69884	4.02461	0.878205	6.4535
TCGA-FW-A3R5	3.07945	0	4.67611	3.16133	3.98112	3.52627	4.71579	5.93224	3.21513	3.16549	7.13756	4.91899	1.66814	1.83878	3.04264	1.28321	8.6433
TCGA-D3-A8GB	2.56986	1	7.3495	3.03392	7.65483	6.25589	6.91388	5.90518	3.93233	3.43762	8.04123	4.65763	2.87525	4.88701	4.93328	0.492914	9.81834
TCGA-GN-A263	1.27945	1	4.13645	3.51838	4.35364	3.5506	4.3554	4.33112	3.40904	4.35629	7.94282	5.05423	1.89605	3.63067	3.35935	0.0844591	7.83865
TCGA-FW-A3TV	1.12603	0	4.28745	3.65926	3.93882	6.03494	2.91709	4.06163	3.27042	3.56678	7.88977	5.20215	2.01964	3.87762	3.46413	1.41232	9.4973
TCGA-EE-A2MU	4.43836	0	9.32097	4.53742	7.50859	7.14574	6.59212	7.5789	4.97831	3.31313	7.39701	6.57605	2.57008	4.66607	4.25426	1.32286	8.99563
TCGA-EE-A20C	12.6055	1	8.81294	2.49716	1.52036	4.77036	1.20709	0.392215	2.32225	3.98419	4.28526	5.33865	1.01349	3.66528	1.26167	0.655491	10.5823
TCGA-FS-A4F2	4.17808	1	7.84629	3.81996	1.4096	7.26903	1.25394	0.591827	3.77189	3.2766	6.58527	6.65903	1.30135	2.73885	0.911162	0.689511	8.8523
TCGA-EB-A42Z	1.20822	0	6.81998	2.7668	4.29272	5.27997	3.693	4.1385	2.47863	3.0471	7.8534	5.25665	1.15703	4.40558	0.891874	2.52832	10.4943
TCGA-D3-A51R	5.31781	0	3.41606	0.22313	0.519321	2.41418	0.497003	0.244968	0.519202	2.65475	3.39182	2.87339	0.081651	0.18447	0.191979	0.0625399	7.20984
TCGA-EE-A29R	1.20548	0	7.80995	1.87555	2.48358	4.39846	1.87298	2.78716	1.76182	2.78373	6.88901	5.34973	0.535422	2.84632	1.56129	0.466403	10.4159
TCGA-EE-A2GL	6.63836	0	7.86061	2.36344	5.94998	4.87437	3.80116	5.49419	4.83519	3.08715	7.95046	6.29374	2.10401	3.96827	6.55774	0.422581	8.70773
TCGA-DA-A1I0	1.69863	1	4.71364	2.87986	4.35319	5.61649	1.15423	2.87244	3.05494	2.21184	7.62545	5.22515	1.56492	2.49747	4.55085	0.60162	11.247
TCGA-D9-A148	12.6274	0	8.02433	2.49102	5.08168	4.45639	4.19164	5.0244	3.02373	3.23407	5.12483	5.75842	2.09529	4.08625	1.97562	0.817383	7.23504
TCGA-D3-A51K	2.74521	0	8.6433	2.812	5.52152	6.4245	3.66955	3.19183	2.58188	3.44098	7.75616	4.65658	2.00888	4.73225	3.0118	0.318942	7.059
TCGA-EE-A3J3	14.3479	1	9.68833	3.28571	5.46078	5.36265	5.12555	4.91032	3.78462	4.07534	8.31224	5.21058	1.71929	4.68033	2.76647	0.528388	9.65179
TCGA-FS-A1ZK	1.99452	1	6.65656	1.35928	1.51667	3.50481	1.3099	0.954257	1.71836	3.02596	7.00962	5.85186	0.343764	3.15655	0.891661	0.637959	7.17333
TCGA-BF-A3DM	1.64658	0	10.5823	2.29455	3.61826	5.36857	4.49994	1.5006	2.05321	4.24734	8.2898	6.92644	0.528387	4.7868	3.00496	0.429792	9.33636
TCGA-GF-A6C8	0.169863	0	9.1035	3.01618	5.26384	5.74912	6.48104	4.68883	3.46006	4.1147	7.31785	6.56003	1.15206	4.60389	3.91465	0.865928	9.81834
TCGA-EE-A2M8	1.64658	1	7.88224	5.63339	9.53074	8.39556	8.32373	8.90775	6.53726	3.85482	6.95533	6.4535	4.09521	4.12453	5.17527	1.71603	9.68833
TCGA-D3-A3CF	2.04384	1	6.5173	4.15118	5.14381	6.5968	5.62171	5.61436	5.05283	3.92237	8.33471	4.97258	2.95453	4.04766	5.88271	1.35983	9.48095
TCGA-ER-A19G	25.1726	0	8.90775	3.49052	6.60857	6.8673	8.89291	6.50216	5.5386	4.51957	6.21194	8.32373	2.23049	5.00647	3.63245	1.27061	9.1196
TCGA-BF-A1PU	1.06027	0	3.03855	1.09272	1.9557	4.37626	0.205649	0.853155	0.807709	2.28675	9.2262	5.83789	0.600149	4.18136	1.74641	0.899156	9.53074
TCGA-FR-A3YN	7.74795	0	8.19677	3.16388	5.70298	5.58304	5.00845	5.46738	3.44463	3.95619	6.70221	6.4245	1.62121	4.07823	3.39609	0.717292	9.79936
TCGA-EB-A5VU	0.879452	1	3.71178	2.5853	2.52738	6.05292	3.02123	2.55237	3.59138	3.12906	8.33471	6.47439	2.41627	2.85398	0.949672	0.945952	8.21685
TCGA-D3-A2J9	1.98082	1	8.42118	4.19412	9.21138	7.30897	7.73716	9.41513	5.77399	3.28374	6.90745	7.18519	4.67297	4.27433	6.10691	1.40278	9.92469
TCGA-EB-A4XL	2.12877	0	7.71174	1.64121	4.84167	4.81538	6.76892	6.53726	2.81607	3.43455	6.69685	5.97943	3.99007	4.71579	1.92646	0.853155	9.4486
TCGA-BF-AAP8	1.22466	0	7.35911	1.9816	4.14663	5.49812	2.42379	2.32196	1.97149	3.56747	6.65179	3.41743	1.42333	3.0727	0.712267	0.239854	9.13588
TCGA-D3-A3MO	0.778082	1	6.81436	1.9132	1.638	5.42491	0.222223	0.138608	1.66322	2.87955	6.57832	5.75728	0.640044	2.77511	1.34943	0.388331	12.2573
TCGA-EE-A2GH	18.3534	0	6.72588	4.48466	8.26844	7.0627	6.8403	8.2898	5.00579	2.54308	7.64904	5.13425	3.95578	3.62398	3.54679	0.649346	9.81834
TCGA-FS-A1Z0	16.8877	1	8.2067	3.96786	5.88271	6.33847	7.32236	8.34672	5.35225	3.72695	6.83719	5.6564	2.86474	3.81889	3.23229	1.24641	7.69856
TCGA-EB-A5SG	5.68767	0	7.9666	4.81944	8.83904	7.29122	8.43363	9.30576	5.76681	2.9436	7.059	6.70745	4.48276	5.30351	4.15533	1.84364	9.56424
TCGA-EE-A2GP	1.1589	1	8.48398	3.91044	3.75283	6.55089	4.14133	4.27002	4.58009	3.80266	6.10055	6.13251	1.94797	3.49972	2.33848	0.81223	9.99323
TCGA-EE-A29V	2.15616	1	3.65539	1.41582	2.61285	4.07492	0.65744	1.10136	1.16833	2.69319	8.37087	5.87348	0.841786	3.70391	1.96555	0.887177	8.16789
TCGA-LH-A9QB	30.7315	0	7.56248	1.71574	3.47639	4.00964	2.92678	1.73853	1.7932	3.28405	5.2431	2.56083	0.619639	2.01185	2.34027	0.283052	11.4133
TCGA-W3-A825	5.25205	1	6.61093	3.67316	5.93369	6.98208	5.62799	6.21883	4.22586	2.797	6.13897	6.19498	2.08717	1.30342	2.46711	0.725989	10.0189
TCGA-EB-A3Y6	0.345205	0	7.08137	2.88647	4.56026	5.78944	5.09161	5.38094	2.82252	3.693	6.99612	5.61021	1.22333	4.77598	1.59829	0.69122	8.77315
TCGA-EE-A183	2.2411	1	7.56792	3.32761	5.34631	6.041	2.51529	3.85893	3.73013	2.61105	7.69856	6.60147	2.0983	3.35704	5.55269	1.06937	8.89291
TCGA-EB-A4P0	0.893151	1	7.04461	2.40683	4.52796	5.51859	3.67874	3.69992	2.10011	2.84542	8.22683	4.15994	1.00295	5.50209	0.935285	0.0762243	9.28995
TCGA-ER-A19M	5.08767	1	9.53074	4.21138	7.06634	6.34232	8.40832	8.12876	4.96555	3.29997	7.0627	7.22672	2.85092	5.1328	2.37458	1.19987	8.39556
TCGA-GF-A2C7	0.0575342	0	4.9041	1.5513	3.08868	4.47279	0.395466	0.611922	2.00527	3.03485	7.26036	5.45158	1.75592	3.97451	1.00622	0.740716	8.42118
TCGA-EE-A2MS	13.5397	0	5.63556	3.08494	5.83289	6.59445	3.85708	4.18392	4.10949	3.25475	5.48942	6.31044	1.82634	2.8247	1.7926	0.592181	6.56225
TCGA-EE-A3JB	16.8164	0	8.8523	4.8517	4.39425	7.03403	5.64536	4.30457	5.92415	4.53889	6.28441	6.02901	1.96374	2.36857	2.20825	1.13183	10.2432
TCGA-DA-A95Z	1.08493	0	8.99563	2.4187	3.91427	4.53641	3.77357	4.56514	3.10381	2.74588	7.88977	6.17163	1.62544	3.23668	1.18675	0.858334	7.80309
TCGA-D9-A4Z5	0.59726	0	6.94248	3.85034	2.82927	6.74976	2.77451	2.14005	3.73803	3.7766	7.95046	7.36357	1.48912	4.96177	1.47755	0.761824	9.7062
TCGA-D3-A3CB	13.8767	0	8.21685	5.02244	7.88977	7.46649	5.98381	6.58758	6.66396	3.96592	6.54631	6.69416	3.05684	4.1886	5.52742	1.98041	9.24196
TCGA-BF-A1PX	0.772603	1	8.52357	3.74887	8.04963	6.97555	5.89577	6.47439	3.89213	2.50054	7.99939	5.78343	4.05876	4.58616	3.40145	1.16093	9.41513
TCGA-EE-A2GU	7.90137	0	8.66911	3.64968	6.57832	5.25258	5.89444	7.56792	4.65389	4.34199	6.38064	6.92644	2.04054	4.69202	3.61826	1.24692	6.60857
TCGA-D9-A6E9	0.824658	0	8.86583	4.72071	8.83904	8.08412	5.67145	6.74173	5.206	2.85702	9.15014	7.26903	3.15268	4.77484	4.30283	2.03541	8.61704
TCGA-GN-A4U8	4.07397	0	9.0101	3.82366	7.06634	6.89526	6.97555	7.14181	4.59133	3.58092	7.43608	5.81061	3.10473	4.86641	4.82177	0.456056	9.05722
TCGA-DA-A3F2	2.8274	1	7.71797	5.93088	9.21138	8.70773	3.54099	5.47867	4.91339	2.00648	7.33606	5.4121	4.20415	3.39644	4.71312	2.25115	8.24738
TCGA-FS-A4FB	2.2274	1	9.63461	1.31912	2.28186	3.9415	0.691522	1.44057	1.43322	3.04488	7.1977	4.81538	0.675821	3.30769	2.53919	0.523567	9.2262
TCGA-EB-A5FP	1.24384	1	6.52613	1.28814	1.9001	2.05017	1.57407	1.98548	0.571435	3.19505	7.04116	4.70113	1.44179	4.05081	0.339906	0.531084	8.13853
TCGA-D3-A8GK	14.1836	0	4.63682	1.53036	2.55237	3.37423	0.244702	1.0988	0.722637	3.13832	8.00783	5.28474	0.196001	2.95984	0.596858	0.782784	7.0202
TCGA-EB-A44R	0.863014	1	8.47128	2.50022	6.40465	5.8068	3.28245	4.80617	3.08494	3.25057	7.04461	4.6245	1.25539	4.15077	2.02117	0.497918	7.55177
TCGA-EE-A2M5	1.80548	1	5.21058	2.86288	5.45524	5.52643	5.18719	5.52742	3.62963	3.52934	8.9365	3.18707	1.24994	1.56579	3.10981	1.44777	11.1665
TCGA-ER-A2NB	2.34795	1	7.16174	2.42024	6.97863	5.8801	3.01024	3.74561	2.82587	2.15025	7.47166	5.05355	4.34917	4.0374	2.1743	2.25506	8.40832
TCGA-D9-A3Z4	1.42192	1	9.94709	3.17345	5.78823	5.78463	6.28626	6.23111	4.29358	4.33693	6.89526	5.69163	1.51549	4.88401	2.92864	0.579582	9.78044
TCGA-EE-A2GD	28.3452	1	7.86061	5.14236	3.87493	7.50351	2.99156	2.22929	5.30188	3.16325	7.32705	7.10717	1.7541	3.07145	3.67101	1.31864	10.5823
TCGA-GN-A4U7	0.868493	1	4.1038	0.98106	2.05678	3.37653	0.579139	0.814616	0.621784	2.97379	7.56248	4.19327	0.298854	2.98317	0.975279	0.472396	9.04156
TCGA-EE-A182	1.22466	1	4.92081	3.15396	5.09934	6.7799	1.79498	2.61857	2.96136	1.99415	9.39877	5.35561	1.49078	3.274	2.02685	1.16287	9.28995
TCGA-GN-A8LN	2.11507	0	6.18664	3.1335	2.77912	7.16174	5.77285	3.48619	3.69735	3.03117	6.64942	7.12598	1.44592	3.87607	1.39012	0.273394	10.0977
TCGA-W3-AA21	8.75342	1	6.18993	0.986863	4.19287	3.19438	4.26576	2.88772	1.24562	2.64235	7.67339	6.14712	0.703213	4.75581	3.12534	0.289278	9.72484
TCGA-EE-A29B	7.09041	1	8.04123	3.44299	4.14052	5.6704	2.23255	2.23886	3.34883	3.23213	8.22683	5.43034	1.18445	4.56859	1.30135	0.702753	7.27786
TCGA-D3-A3CE	5.01918	1	5.58502	3.68983	6.58979	7.24763	6.75817	7.18152	5.1328	2.98161	6.51504	6.68405	2.09046	2.9131	3.32464	0.789768	8.30074
TCGA-EE-A20I	1.12877	1	7.596	2.61013	4.96815	4.75638	4.00328	5.06506	2.99869	3.59586	7.94282	6.58054	1.27725	4.49797	2.5596	1.08047	6.96522
TCGA-D3-A2JE	2.30411	1	7.30458	1.15206	2.51375	3.24994	2.54434	3.02627	1.52036	2.91372	6.92312	4.30151	0.881743	0.611628	1.51184	0.817383	7.97478
TCGA-EE-A3AB	10.2274	0	8.2368	5.05	4.51813	8.02433	2.91401	2.64663	5.54971	2.94803	5.78463	6.84897	2.91372	1.43738	1.94943	1.19742	11.247
TCGA-D3-A8GR	10.8027	1	8.73306	2.27943	3.44364	5.38891	1.46832	0.821284	2.08746	3.42819	8.74606	4.13317	1.92433	3.4692	0.857534	0.311617	8.40832
TCGA-W3-A824	19.0137	0	9.78044	3.53105	7.0306	5.63014	7.13756	5.80054	3.6674	3.85106	8.54966	6.4493	1.77573	5.4176	2.84234	0.961942	8.90775
TCGA-DA-A95Y	1.17808	1	7.00631	2.50476	2.41808	4.24009	1.44364	1.42252	1.59684	3.32002	6.98562	4.3795	1.06217	3.21286	2.25326	1.43738	9.05722
TCGA-GN-A4U3	10.1589	0	8.45867	2.8675	2.81941	5.3353	1.72508	1.64925	2.08746	3.42543	6.47439	7.17333	1.0051	4.88759	0.666114	0.370021	8.83904
TCGA-ER-A196	4.89041	0	4.5419	2.00766	5.02373	4.26959	2.35795	1.91861	2.19289	3.19987	6.64193	5.30691	2.24516	2.67715	2.06496	1.60685	10.0189
TCGA-DA-A95W	3.11233	0	9.43193	2.36128	5.43506	5.62482	4.1524	4.36943	2.5347	3.23864	6.46175	5.63448	1.63401	5.03317	1.80264	0.757409	7.66081
TCGA-WE-A8ZR	0.750685	1	6.53498	2.40715	3.67839	4.67453	2.70597	2.77789	2.46291	3.38988	8.33471	4.47946	1.07519	4.56514	2.76864	0.397938	7.95046
TCGA-WE-AAA4	2.08219	0	8.9365	4.70548	9.39877	8.26844	7.04823	7.15372	5.16274	2.70047	9.63461	8.2067	2.51866	3.96592	4.51813	1.80231	10.125
TCGA-BF-AAOX	1.21644	0	6.6814	0.607069	2.8253	3.37653	1.74466	1.88019	1.0911	2.80984	8.33471	4.38365	1.26118	2.8653	1.85226	1.26682	7.29577
TCGA-DA-A1I8	4.49315	1	9.30576	3.83556	2.85153	7.90441	2.54795	1.17128	4.11799	3.5075	6.71811	7.39195	1.36268	3.81514	3.62538	1.38226	11.4133
TCGA-EE-A3J5	3.07945	1	5.53653	3.97103	6.12274	5.94302	5.73391	6.71544	4.19412	3.10883	7.47166	5.79068	2.46445	2.80644	3.78687	1.14599	8.77315
TCGA-XV-A9W2	1.14247	0	6.48104	1.07957	2.8346	4.69148	5.91458	4.96943	1.57582	2.99526	7.79637	3.9415	3.48283	4.46007	1.14291	1.11725	8.30074
TCGA-BF-A3DJ	1.27123	0	9.59881	4.5424	4.92142	7.30458	5.11185	3.91772	4.62188	3.93573	7.23918	7.53005	2.03869	4.22071	2.82558	0.899785	10.3428
TCGA-BF-AAP2	1.10959	0	6.83441	2.11523	4.40444	5.44237	4.49418	4.37812	2.45353	3.69054	7.47671	5.27829	1.84665	4.57756	2.825	1.78611	7.42128
TCGA-EE-A3AA	10.3589	0	7.09592	3.49426	5.45616	5.30188	5.99538	6.22757	4.58205	4.31166	7.86061	7.22672	2.28914	4.29577	5.25827	1.32648	10.0977
TCGA-D3-A2JG	9.46027	1	5.28728	1.7541	3.74706	4.16914	2.68552	2.65231	2.33545	3.27756	6.73914	6.09891	0.90038	3.15686	1.50367	0.572542	8.45867
TCGA-GN-A8LK	4.17534	1	3.56299	0.597239	2.43468	2.91862	0.440544	0.608887	0.285683	2.84693	8.17747	4.72235	0.232702	2.37034	0.42268	0.758841	6.99612
TCGA-EE-A2MT	5.93425	0	6.33117	2.1938	4.02304	3.64368	3.14701	3.86451	1.59427	3.43525	8.2368	7.08137	0.52732	2.27284	1.6615	0.611476	9.21138
TCGA-EB-A44Q	1.15616	0	8.92238	3.9086	7.09592	6.67152	7.42642	6.62994	4.58981	3.99007	7.47166	6.90424	2.90223	4.56121	4.1792	1.22461	6.20499
TCGA-DA-A1I7	7.40548	0	7.25181	5.73973	4.2679	5.79556	3.8742	4.31827	3.29997	4.32756	6.52376	4.52451	1.55301	2.71151	2.28157	1.35741	12.3846
TCGA-D3-A8GP	12.7068	0	7.22281	1.20161	3.57614	3.64578	2.18061	2.5859	1.16616	3.09908	7.54668	5.17372	0.553196	4.71036	1.07569	0.376379	8.66911
TCGA-EE-A2GJ	6.21918	1	7.73067	4.97959	5.84675	8.44587	6.65656	5.85058	5.92284	4.08262	6.97863	6.64452	3.16038	3.78723	3.36795	1.3242	7.28662
TCGA-EE-A2A2	4.96986	0	7.12979	2.37551	4.14338	4.64042	4.95282	5.45894	3.452	3.66275	7.13365	6.66396	1.9792	3.44332	4.27433	0.468979	7.39701
TCGA-GN-A9SD	4.95068	1	6.52843	3.36398	4.98216	5.96383	4.65658	5.55269	4.50141	2.8644	6.53286	5.54866	2.75382	3.91579	6.35938	0.593654	9.78044
TCGA-D3-A8GQ	2.42192	1	6.34038	1.97506	3.48753	5.38891	3.37423	2.08985	2.46622	3.27301	5.66177	6.63949	0.459596	1.05425	1.11987	0.746267	8.43363
TCGA-D3-A1Q7	11.1041	0	9.27406	4.93328	8.16789	7.46649	9.02556	9.39877	6.16338	4.71579	6.83159	6.93606	3.21672	4.83105	4.35942	1.69323	8.9365
TCGA-EB-A44P	2.03014	0	8.37087	1.58773	4.67823	4.7823	3.56368	3.87533	1.32069	3.44299	8.58981	6.62527	0.540759	5.00448	3.42922	0.59671	9.99323
TCGA-YD-A89C	0.575342	0	3.54333	1.50905	1.79557	4.88639	1.40333	1.73879	1.67509	3.06463	5.34973	4.50541	0.318883	0.772119	0.944342	0.257026	7.01302
TCGA-W3-AA1Q	5.75616	1	7.20984	2.29862	5.28474	4.8858	4.8399	5.4094	3.02344	2.95703	6.72588	6.51092	1.80467	4.39284	2.95921	1.02576	9.2262
TCGA-WE-A8K5	5.09589	1	7.35911	2.92835	5.01916	5.00111	6.21546	6.07577	3.23765	3.23309	7.02374	4.98348	2.11124	4.11069	2.18178	0.548444	8.03302
TCGA-GN-A265	8.07671	0	8.82599	4.88938	6.99612	7.92732	7.25181	7.62545	6.18993	3.19859	7.4314	7.0376	3.92123	3.43421	4.7665	1.31253	10.5823
TCGA-ER-A3ES	20.5863	1	3.14125	0.803807	1.60984	2.09589	0.608724	0.169733	0.880399	3.58613	5.51279	3.74451	0.119587	4.45216	0.373077	0.123859	5.84302
TCGA-ER-A42H	1.16712	1	7.98248	2.52227	1.81121	4.80958	1.88766	1.44057	2.31923	2.71917	7.17738	4.88158	0.869994	3.48985	0.43904	0.133792	8.19677
TCGA-EE-A2ME	8.60548	1	7.80309	4.74361	8.31224	6.6615	8.30074	9.02556	6.73123	3.72375	6.33485	6.16172	4.2435	4.41402	7.14976	1.09132	8.73306
TCGA-FW-A3TU	4.63288	1	6.73653	3.07053	4.59588	5.42311	1.30369	1.48969	2.32918	2.75536	7.80995	5.47969	1.06746	4.35319	1.19053	0.879439	8.8523
TCGA-FS-A1ZS	12.4	0	4.96748	4.19707	2.45442	5.81683	2.17742	1.63772	3.5924	4.53297	6.98892	2.52283	1.14191	1.26221	2.19258	1.47583	11.9814
TCGA-EB-A5UM	2.13425	0	6.77167	1.64694	6.07889	4.7868	4.27733	6.57146	2.70503	2.85645	8.77315	4.61058	1.96825	4.14194	4.31783	0.295059	8.54966
TCGA-D3-A8GN	13.4164	0	9.28995	2.87678	6.82865	6.08947	5.61339	5.7858	3.30865	2.56202	6.37469	6.98562	2.88393	5.03183	2.96265	0.902613	8.95055
TCGA-EB-A97M	1.13425	0	8.37087	3.36993	5.31273	5.7421	4.22586	4.81888	3.45167	2.62067	10.7307	5.79802	1.18387	3.32231	2.54157	0.94615	9.56424
TCGA-D3-A2JA	9.6274	0	9.08851	4.6867	5.50116	7.12979	6.71811	4.77829	5.46553	5.3987	7.24763	5.02976	3.08776	4.28701	3.3762	1.10604	11.247
TCGA-YG-AA3O	3.16164	1	4.98479	2.91833	4.22293	4.73657	3.09941	4.36262	3.04045	3.0081	7.25181	5.20521	1.50118	3.14635	1.97056	0.758349	7.31785
TCGA-D3-A8GC	6.63288	1	6.74439	2.94175	3.22275	4.38963	2.47558	3.14317	3.24994	3.92739	6.62756	6.89526	1.44393	3.20346	1.94405	0.901619	9.25821
TCGA-BF-A1PZ	2.33699	0	5.89051	1.87433	4.28263	4.48752	3.79199	3.74168	1.74147	3.74023	8.61704	5.11905	0.755487	4.49036	2.34152	0.828764	9.24196
TCGA-ER-A19T	0.739726	1	7.0202	3.75283	4.90663	6.24883	3.84996	4.15789	4.19327	2.86842	7.17738	5.59967	2.4139	3.74777	2.37796	0.8692	8.47128
TCGA-GF-A6C9	1.31507	0	9.16614	4.50043	6.85196	7.14976	5.48504	7.20984	5.40671	3.51903	6.92965	5.78944	3.99788	4.25468	5.09725	1.64633	9.66998
TCGA-FW-A5DY	1.60822	0	8.58981	3.22438	5.72929	5.94998	4.298	5.14822	5.30026	3.2057	7.53005	6.91066	2.86381	3.90095	6.91685	0.941144	9.28995
TCGA-FR-A8YC	2.90137	1	8.74606	2.21872	4.99263	6.03494	3.97956	2.44289	3.23407	3.42713	5.64204	6.1569	1.48058	3.47433	1.2076	0.326074	8.52357
TCGA-D9-A149	4.55616	0	10.0692	3.81699	6.62994	5.43215	6.38261	5.85186	4.5533	4.90851	7.55736	5.85697	1.89217	5.37833	3.94223	1.00805	7.52439
TCGA-EE-A29G	6.00548	1	7.10338	2.83334	5.07548	5.16274	3.5259	5.27912	3.99475	2.85336	6.73385	4.60495	4.80162	2.39436	2.00615	2.24815	8.66911
TCGA-FS-A1YY	19.0493	1	3.87646	2.61317	2.52496	4.71091	1.19281	1.32149	2.50292	2.64811	8.17747	4.5523	1.19223	2.70903	0.99518	0.800836	8.98038
TCGA-EE-A3J4	10.6	1	9.16614	2.61737	4.38321	4.84398	6.40056	5.36002	3.16934	3.95578	6.81998	5.67594	1.36379	4.77427	1.84066	0.838404	8.19677
TCGA-EE-A20B	11.1507	0	7.29122	3.87007	5.6017	6.56683	4.55529	5.00779	3.86971	2.72809	7.02711	6.53498	2.028	2.93526	2.13439	0.929164	8.98038
TCGA-EB-A4IQ	1.74247	1	3.83374	0.983609	3.11556	4.11678	0.224635	0.880791	1.01261	2.92366	8.12876	5.52947	3.66275	2.59227	0.684612	1.41985	7.00293
TCGA-EE-A29M	4.73699	0	9.90167	2.99404	5.45894	5.03317	5.21893	6.05292	3.64857	4.50877	6.66645	6.62527	1.28689	4.89062	4.36811	0.616893	7.46155
TCGA-FS-A1ZM	8.43836	0	6.59906	4.52895	6.71811	7.17333	5.77285	6.07728	4.99396	4.02579	8.50986	5.89972	2.50832	3.93611	2.54823	0.91097	10.2736
TCGA-BF-A5ES	1.34247	0	6.33847	3.11962	4.90159	5.50603	3.84301	3.83003	3.23181	2.67287	9.61682	6.439	1.4047	4.21053	2.50594	1.29146	8.33471
TCGA-EE-A2GK	4.56164	0	7.20572	3.36301	7.30458	6.0275	4.26065	6.041	6.38462	2.71457	6.27713	5.71205	3.93461	2.80007	8.35944	0.65707	7.99123
TCGA-DA-A960	2.20274	0	4.60036	1.07224	2.08203	3.35656	0.41118	1.08971	0.992883	3.42612	9.72484	4.68506	0.788382	2.35648	0.543494	0.391353	7.3736
TCGA-GN-A26A	2.70685	1	6.11803	4.68184	5.34973	7.35911	4.45026	5.42582	6.0865	2.94391	6.39453	6.85513	2.9168	4.04139	3.16133	1.92587	12.1231
TCGA-GN-A264	9.8274	1	4.30765	2.77699	3.02123	4.59689	2.05616	2.49989	2.91527	2.80738	6.61586	3.73156	1.27655	3.04583	1.12497	0.509436	6.96522
TCGA-EB-A3XE	0.493151	0	6.46175	2.05902	5.41578	4.98543	4.51567	5.74556	1.44976	2.32371	8.60301	5.14236	3.67527	4.76595	2.61466	0.749656	9.81834
TCGA-FW-A5DX	1.75342	0	6.70479	2.19526	2.84876	3.7635	2.74743	3.21513	2.66624	3.52799	3.40407	4.49279	0.563661	2.66047	2.27585	0.328167	9.81834

## Sheet: additional file 3
id	futime	fustat	BST2	C3AR1	CCL5	CD14	CXCL10	CXCL9	CYBB	EIF2AK2	EMP3	ICAM1	IL18	RTP4	SELL	SLC31A2	TIMP1
TCGA-EB-A550	0.723288	1	8.60301	1.34888	4.20632	5.05	3.22984	2.29697	1.71957	2.9542	7.98248	3.65926	3.1448	4.12824	1.33666	1.38847	8.72029
TCGA-EB-A431	1.55616	0	7.63118	1.75738	3.12815	3.8496	3.35077	3.29057	1.70316	3.71724	6.14057	5.16997	0.384948	4.61003	1.84632	0.654263	7.0306
TCGA-EE-A29H	5.3863	0	7.74989	2.73147	4.1385	4.81365	3.77338	4.30242	3.42819	3.56402	6.8431	5.20287	2.02295	3.74777	3.21188	0.708107	9.56424
TCGA-D3-A2JD	0.989041	1	7.16174	2.70903	4.46054	4.8084	1.3242	2.45563	3.33285	2.0577	7.61381	5.35394	1.52404	3.49088	5.98821	0.899785	9.94709
TCGA-BF-AAP1	1.12055	0	9.04156	1.84066	2.41599	4.66822	1.85824	1.62848	2.41899	2.51712	6.23989	5.45063	0.812389	4.48513	0.96028	0.442093	7.11111
TCGA-GN-A268	5.23288	1	4.99786	2.41542	2.56202	4.34429	2.43588	1.71016	2.37913	4.23009	7.60187	5.20444	0.592552	2.87646	1.42666	0.653309	7.66081
TCGA-GF-A769	2.93151	1	7.34042	2.73117	2.14581	5.69954	1.9858	1.34513	2.60678	3.14701	7.51916	6.38261	0.781019	2.07149	0.632614	1.08506	10.8992
TCGA-FS-A1ZQ	11.1288	1	4.98281	2.56068	3.70607	5.60589	1.74205	2.40591	2.88174	2.8805	6.62045	5.787	0.774442	3.44598	3.2164	0.590901	9.46385
TCGA-EE-A2A1	9.66301	0	8.02433	4.5533	6.50216	6.90745	5.68605	7.20984	5.35828	3.65572	6.86107	5.96242	2.76095	4.06001	5.03583	1.12127	7.596
TCGA-EE-A3JD	2.27945	1	6.41042	4.98606	6.99958	6.34792	7.3736	7.55736	6.1037	3.89289	6.71544	6.64193	3.80834	4.12948	6.74173	1.20161	9.85975
TCGA-EE-A3AH	11.5671	1	6.279	2.25177	1.85648	5.32951	1.7997	2.39404	2.22716	3.32827	5.85058	7.31785	0.369979	3.05991	1.45649	0.413017	8.35944
TCGA-XV-AAZV	1.12877	0	8.65607	4.95662	5.33779	7.45642	5.38009	4.77092	4.46336	2.79366	8.52357	4.37395	3.94299	3.77411	2.89478	1.59829	12.5093
TCGA-D3-A51N	1.88493	0	10.0977	3.72695	5.47682	7.81695	6.28997	6.23809	4.4695	3.81889	7.30458	6.74705	2.55541	5.17298	3.43862	0.915708	10.8992
TCGA-EE-A29N	1.55068	1	6.13897	3.47121	5.8317	6.15198	5.61962	5.66407	5.02705	2.81014	8.61704	7.33606	2.35495	4.0077	4.88639	1.28266	9.92469
TCGA-EB-A3Y7	0.893151	1	4.8399	2.59376	3.94	4.49655	1.52581	0.716023	0.724927	2.53712	10.0189	5.50505	0.214853	3.67597	1.25247	0.990474	9.83855
TCGA-EE-A184	5.67945	1	4.53347	2.9539	5.81307	4.96177	3.77375	5.78098	3.71976	2.91862	7.66081	6.26111	1.82011	4.298	2.75382	0.851609	7.16174
TCGA-EB-A5KH	1.69589	1	3.89867	2.05228	3.32231	4.14787	1.32573	2.03512	1.61983	2.8349	7.71797	4.4587	0.788166	4.6281	2.66624	0.459291	8.22683
TCGA-D3-A2J7	8.59178	1	8.81294	4.29141	6.75817	5.29219	5.05689	6.20854	3.63765	4.49036	7.91146	6.44518	2.11336	4.64199	3.08806	1.22305	10.0189
TCGA-EE-A2GE	14.4822	0	6.79698	4.97007	7.76948	7.50859	7.23918	7.45102	6.00525	3.16199	6.2735	7.91921	3.15459	4.01763	4.56465	1.3247	10.2736
TCGA-EE-A3J8	2.86027	1	6.69416	2.48312	1.62121	2.87089	1.37069	0.727074	2.25147	3.9002	6.09572	5.30691	0.845631	2.75839	0.138582	0.0817433	7.83102
TCGA-D3-A2JC	7.23014	0	9.18088	3.53073	6.33296	6.8172	5.08168	6.16172	4.58566	2.84142	7.91146	8.57634	2.25954	4.05039	2.68983	1.04344	10.4541
TCGA-EE-A2MF	22.3945	1	10.3428	3.7887	4.52499	7.4314	4.98606	3.72839	4.72179	4.82358	6.36906	5.37748	1.82261	6.25406	2.65751	0.816154	8.31224
TCGA-D3-A3C8	3.86027	0	9.27406	4.7306	10.0437	6.96201	9.78044	9.85975	5.75728	3.61087	7.20183	6.93933	4.57709	5.12774	5.53754	1.63367	9.59881
TCGA-W3-AA1O	0.334247	1	7.00962	2.51104	2.44224	4.39146	1.99862	1.75443	2.04686	3.43592	8.79948	5.88537	0.803119	2.71947	1.25863	1.37952	8.47128
TCGA-FS-A1ZW	4.12329	0	6.85809	4.23352	5.76205	4.99528	7.39195	7.17738	6.07257	3.56056	6.07889	5.73391	3.06898	3.75031	3.0373	0.646868	8.10199
TCGA-FS-A1ZY	2.25753	1	6.71273	1.79204	2.17281	4.32275	1.51859	0.912356	1.46169	2.95703	7.64322	6.25227	0.368905	3.46075	0.961107	0.319493	7.6925
TCGA-D3-A2J8	5.45753	1	8.68157	3.67702	7.94282	6.64942	7.84629	8.34672	5.18572	3.98695	7.57332	5.94438	2.07269	3.89559	4.86284	1.74581	9.39877
TCGA-EB-A1NK	2.84658	0	4.42551	2.64601	3.85798	5.77399	2.53586	2.87923	2.29393	2.733	7.27326	5.65961	2.18476	3.10163	1.58519	1.171	8.89291
TCGA-FS-A1ZP	6.2274	1	5.6704	3.94223	4.36079	5.0025	3.67491	3.75211	4.67823	3.2305	5.69054	5.04524	2.12631	4.79821	4.40127	0.511744	7.44084
TCGA-ER-A19K	1.28493	1	6.0275	2.54341	5.02111	4.79019	4.84518	4.88639	2.86133	3.74274	8.66911	5.93495	2.52378	3.7806	1.92465	1.31014	7.23504
TCGA-EE-A2A6	7.17808	0	7.55177	3.30512	6.78548	5.93632	5.33369	5.97806	3.56056	3.3125	8.03302	7.64322	2.03423	4.4695	4.40259	0.795586	9.19635
TCGA-WE-A8ZT	0.983562	0	6.16674	1.75177	2.31687	3.8244	2.34688	3.08526	2.00979	3.09347	6.10521	4.80731	0.815671	4.1483	3.31541	0.350629	8.70773
TCGA-EE-A29D	1.16438	1	6.61093	2.71183	2.58499	5.26543	1.49429	1.60423	2.31472	4.20415	8.5371	5.55269	1.36482	3.39839	1.53493	0.577175	8.37087
TCGA-EE-A185	0.413699	1	6.65903	1.54314	1.14495	3.03884	0.725989	0.299319	0.572845	3.19792	9.18088	6.63949	0.843999	2.56863	0.617715	1.06981	7.18519
TCGA-EB-A4IS	2.12055	0	7.73067	3.04264	6.43061	6.20499	6.91685	7.12979	4.68185	4.27996	8.15848	5.98381	2.96573	4.94524	4.5872	0.578772	9.65179
TCGA-ER-A19J	0.536986	1	7.70549	3.00496	3.51804	6.22232	2.88982	2.11552	3.88415	3.36728	5.08235	6.03044	1.50658	3.7686	1.61541	0.633312	9.24196
TCGA-FR-A3R1	1.87671	0	9.87992	2.94145	5.5225	4.74471	6.46603	6.39453	3.19987	4.4587	7.26903	6.3161	1.42786	5.81798	1.73733	1.07791	8.61704
TCGA-YG-AA3N	0.838356	0	8.2898	3.46553	8.54966	7.01302	4.10213	5.51091	3.76823	2.96328	8.16789	5.85058	3.10193	3.8133	2.83924	1.52707	8.40832
TCGA-FS-A1ZU	2.2137	1	4.58157	3.09186	1.52625	6.20161	2.02471	1.19026	3.55987	2.88205	6.23628	5.04793	1.09355	0.986259	1.16476	0.601914	6.87963
TCGA-D3-A2JN	5.53973	1	7.91146	2.83365	6.90118	5.97661	5.12701	5.78823	3.17569	2.99746	6.57398	5.23289	1.75501	2.46382	3.69735	0.422899	11.329
TCGA-EB-A5SF	1.01096	1	4.14705	2.02828	3.13188	4.8725	0.400789	0.583248	0.969737	1.23555	6.97555	4.37351	3.69372	3.40441	0.743422	2.58559	6.65656
TCGA-EB-A42Y	1.97534	1	9.13588	2.90099	3.98613	5.72692	3.08806	1.97562	2.74834	4.10006	7.58432	5.37032	0.950176	4.22379	0.941768	0.736982	6.21546
TCGA-FS-A1Z7	0.649315	1	6.5554	3.69481	3.20992	6.67152	1.81417	2.66953	4.01039	3.0087	6.21194	6.28997	2.06878	2.72188	2.4804	1.03782	9.59881
TCGA-D3-A8GI	4.87671	1	7.14574	2.56594	3.16262	5.42766	2.33005	2.01785	1.49585	2.67812	9.54767	5.94721	1.02412	2.82096	1.34749	1.03399	10.0692
TCGA-D9-A3Z3	1.85753	0	6.18178	3.42246	5.63984	6.21372	4.34696	5.54365	3.83041	2.21155	7.08137	5.65532	2.7921	4.17038	4.4418	1.50482	9.1035
TCGA-D9-A6EC	6.46301	0	10.3428	2.44995	4.15491	4.93583	4.67823	3.02872	2.89043	3.74632	7.43608	7.76948	1.1888	6.07577	0.725111	0.581846	9.54767
TCGA-EE-A17X	2.48493	1	8.04963	2.63286	3.00903	4.85695	1.55042	1.81417	2.24784	3.00527	7.48204	5.04793	0.854026	1.63312	1.5772	1.19373	8.5371
TCGA-DA-A1I4	2.99452	1	7.48204	4.50685	4.25509	7.11469	2.93115	2.39017	5.15982	3.27692	8.77315	6.5968	2.71977	3.8975	3.74706	1.17369	10.4159
TCGA-EE-A2A0	3.90137	1	5.94583	5.04723	6.01878	5.11544	6.14057	6.8431	6.07102	3.54714	5.98381	5.3194	2.87339	4.15077	5.17372	0.750313	7.97478
TCGA-ER-A2ND	1.94521	1	4.99594	2.64811	4.94461	5.48069	3.58649	4.63581	2.21155	3.33585	8.00783	3.86005	2.00257	4.11069	2.00705	0.20586	10.1516
TCGA-EB-A551	1.61644	0	9.61682	4.29186	7.37821	6.98562	6.98892	8.16789	5.29946	4.32841	6.59907	6.8172	4.41492	5.25505	3.38156	1.09674	9.28995
TCGA-YG-AA3P	1.20274	0	4.3581	2.05828	2.59439	4.90034	4.60495	3.58966	3.37991	3.1642	5.50209	2.16227	1.04115	3.08213	1.18737	0.477007	5.31686
TCGA-ER-A19F	2.19726	1	5.63233	2.96883	4.02304	4.82358	4.59082	4.332	3.4031	3.45498	8.22683	5.7444	2.04655	3.49324	2.43738	0.563407	8.27939
TCGA-EB-A41B	0.79726	0	3.72769	1.82634	4.86641	4.31962	4.1996	3.8719	1.7239	3.57511	7.05549	5.80937	0.805552	3.11045	0.76196	1.0876	7.98248
TCGA-BF-A5ER	0.89589	0	8.24738	2.23079	3.63137	4.23183	1.02955	1.12058	1.57182	2.35071	9.24196	6.86107	0.707767	3.20378	1.36212	0.823491	9.53074
TCGA-D3-A51J	12.0932	0	9.94709	4.00729	7.48764	7.74989	6.38462	7.95858	4.97133	3.63349	6.48104	7.059	3.5331	3.96592	4.02938	0.84337	10.1814
TCGA-D3-A8GV	13.9753	1	5.0951	2.31206	2.91076	4.7273	1.66871	2.32582	1.54259	3.14827	8.35944	5.29787	0.49743	3.18384	2.0289	0.681187	9.28995
TCGA-GN-A262	11.6575	0	6.0973	0.0526298	0.556626	1.00059	5.08524	3.93044	2.28762	3.12691	6.44518	4.31564	0.000882767	3.4322	0.384417	0.0382029	8.9365
TCGA-FR-A7UA	3.18904	0	7.44084	5.78823	9.39877	8.48398	9.28995	9.1196	6.76892	3.26031	7.30032	7.63118	4.88759	5.11043	4.97007	2.08774	9.87992
TCGA-EE-A180	7.91507	1	9.92469	2.49716	3.63245	4.46289	4.63785	3.71363	2.51986	4.68292	9.1196	5.61649	0.695351	4.89972	1.69788	0.490165	8.49663
TCGA-RP-A690	0.0164384	0	4.84106	2.9707	2.41571	4.78343	1.04671	1.7046	2.52283	3.26746	5.03856	4.63941	2.10545	4.30195	1.22605	0.470461	7.21417
TCGA-DA-A95V	6.00822	0	9.28995	2.90993	5.79189	6.16836	3.65429	4.61519	3.22888	2.4738	6.6615	5.96383	1.81679	4.3271	3.27756	0.714973	7.83102
TCGA-FR-A8YE	8.70137	0	6.22056	4.39009	4.81311	7.53574	3.73951	5.08451	5.76681	2.9654	6.41843	6.08947	3.16805	3.62538	6.82297	1.42774	9.72484
TCGA-W3-AA1V	3.50685	1	5.27912	3.8507	5.99105	6.36906	4.69681	4.39563	4.793	3.67597	7.12979	3.58407	2.12119	1.93961	1.17732	1.99537	9.87992
TCGA-3N-A9WD	1.08219	1	7.77609	2.21486	5.50116	6.76352	6.4831	6.03793	3.07083	3.15782	7.25604	5.79314	2.3971	3.83229	4.62656	3.53175	8.9365
TCGA-ER-A19D	1.04932	1	5.56874	4.46097	5.57785	7.11848	5.10767	6.47235	5.60589	3.56747	5.20753	4.99848	2.43435	1.52595	3.00964	0.794365	9.58129
TCGA-FS-A1ZZ	2.25205	1	9.02556	1.85136	3.91198	2.67107	3.54509	3.19025	1.63107	5.00314	8.87908	4.04059	0.912617	5.49329	1.26424	0.787701	7.59023
TCGA-ER-A2NF	2.40274	1	7.75616	3.5055	5.86963	5.97101	4.87554	5.33118	3.94569	4.03452	5.29787	4.72893	2.03636	4.51666	3.42115	0.642079	7.90441
TCGA-EE-A2GO	10.5671	0	6.8403	2.95765	1.97209	5.29626	1.30022	1.35767	1.80645	3.29123	4.16418	4.0329	0.43748	1.20636	0.869404	3.29836	11.9814
TCGA-D3-A5GT	1.33425	0	7.41164	1.27083	4.21985	3.07023	0.998782	0.664252	1.08736	2.22143	8.34672	4.06686	0.948632	4.5538	0.461365	0.111626	8.15848
TCGA-BF-A1Q0	2.27671	0	7.66687	2.71365	4.57307	4.51908	4.71364	4.52299	3.49393	3.19438	7.47166	5.35657	1.82544	4.05959	2.70016	1.41582	10.4541
TCGA-EB-A3XC	1.78082	0	7.51393	2.84234	3.90521	5.18645	4.34653	4.40536	2.69715	4.10006	7.20572	4.88095	2.50263	3.21353	1.68616	1.41855	7.98248
TCGA-FS-A1ZF	1.28767	1	7.83102	1.84216	3.90485	4.59281	3.05398	2.96265	2.1076	2.59048	6.37469	4.21525	0.710433	4.15994	1.59856	0.293358	9.1196
TCGA-D3-A2JK	1.00822	1	5.66407	2.59108	4.66182	6.23989	1.79614	1.32033	2.2111	2.09889	9.08851	5.06301	2.05664	3.94299	1.58181	0.333694	11.1665
TCGA-3N-A9WC	5.53973	0	9.94709	3.87117	7.71174	6.39865	6.74439	8.72029	4.49797	4.70005	5.56674	6.73914	3.43088	5.72929	4.02859	1.22823	9.74223
TCGA-GN-A4U4	3.27945	0	8.11965	1.55527	2.84997	3.04898	3.09347	3.02373	1.7953	3.26516	6.75249	5.88405	0.959882	3.12906	2.69105	0.464097	6.48104
TCGA-ER-A19C	4.07397	1	5.36686	2.9539	3.14448	4.68033	1.99892	2.41747	2.61889	2.85367	7.74339	5.10556	0.894782	3.85816	1.19001	0.739099	9.83855
TCGA-ER-A197	1.16164	1	7.53574	4.058	7.45642	8.2067	5.51091	4.7536	5.58398	3.53141	7.69856	6.28084	2.81353	3.41473	2.86657	1.19137	9.78044
TCGA-EE-A20H	14.0219	1	5.10346	1.55077	2.47559	3.43387	2.82989	4.40849	2.0697	4.01281	6.20678	1.85735	0.919295	2.40683	1.2563	0.439893	10.0977
TCGA-EE-A2MP	20.7205	0	9.30576	3.9021	6.51504	7.28662	5.89706	5.97943	4.6867	2.91434	6.11332	5.95418	2.284	4.86398	2.68216	1.28118	9.97052
TCGA-EB-A82C	0.0465753	0	4.47231	1.17026	3.1272	3.12185	2.62663	1.62531	1.09253	3.14796	8.95055	5.2718	0.54685	4.68237	0.820736	0.550427	6.89809
TCGA-WE-AAA3	1.78356	0	9.39877	4.05039	6.25589	6.83441	4.65075	5.44331	4.70219	3.10853	7.3736	5.82786	2.09678	4.77371	2.47442	1.36063	7.87492
TCGA-EB-A24C	1.73151	0	5.12991	1.97264	2.24091	3.87007	2.9707	1.07701	2.07841	3.58198	8.11965	4.31565	1.80881	3.75283	0.928198	0.885503	8.2067
TCGA-EE-A3AF	1.15068	1	8.6433	4.0337	5.39604	5.68835	4.49994	5.34451	4.60036	2.95831	8.99563	6.44731	2.2208	3.63349	2.39138	1.29017	9.27406
TCGA-EE-A2MD	3.93973	1	7.18912	2.85305	4.60085	5.30351	4.05643	5.15338	3.62183	3.71512	4.82177	6.54631	1.69936	3.12216	3.25313	1.21404	7.33171
TCGA-EB-A6QZ	0.964384	1	7.42642	1.57662	2.7921	4.57458	1.9084	0.994994	1.70516	2.82804	8.04963	5.76205	0.462601	3.8185	1.03782	0.274721	9.63461
TCGA-ER-A19N	3.67397	1	7.39701	5.60065	6.8403	7.04461	5.14676	6.51295	5.51662	2.99343	7.88977	5.7444	3.32794	3.55131	4.05563	1.7541	9.13588
TCGA-ER-A19Q	4.2411	1	8.42118	4.95595	5.75139	7.3736	5.56777	7.0627	6.33666	3.27074	7.66081	6.80857	3.12877	3.02872	3.0115	1.49695	8.77315
TCGA-DA-A1HY	12.074	0	9.32097	3.48284	2.21396	4.7071	2.93645	1.58661	2.74002	3.95926	5.26304	6.96522	0.730879	2.39191	2.21991	3.61897	12.5093
TCGA-DA-A1HW	3.00274	1	8.40832	3.92852	6.44731	6.67401	7.87492	8.22683	5.2423	3.23895	6.1342	6.45557	2.861	4.25208	4.43112	1.28062	8.27939
TCGA-GF-A3OT	0.824658	0	5.17753	3.67243	5.57177	6.29565	5.68605	6.77167	4.24179	3.13832	8.03302	5.7549	2.06432	1.81739	1.69612	2.07505	9.36701
TCGA-ER-A19H	12.6959	1	5.38361	2.96169	5.51859	5.76205	7.55177	6.64702	4.49085	4.19327	6.38064	6.41042	1.6143	2.39138	3.06555	0.627451	7.11111
TCGA-ER-A1A1	8.75616	0	6.82585	3.60911	5.54365	6.28083	4.10582	5.27023	5.93224	3.25572	5.72225	5.03387	4.28656	2.84965	8.03302	0.923131	8.54966
TCGA-FS-A1ZR	0.950685	1	6.93933	2.38269	5.3996	4.71312	6.25765	6.03494	3.21286	3.7014	7.02374	5.01512	1.31939	4.20208	3.04647	0.454763	9.25821
TCGA-WE-A8ZO	5.87671	0	7.81695	4.01281	6.62283	7.27326	6.66396	6.1196	5.29544	3.75503	6.83159	6.97555	3.01809	5.23523	2.14581	1.18953	8.95055
TCGA-EE-A2GI	4.06027	0	9.32097	3.2564	6.52843	5.90923	7.21833	6.27713	3.96786	3.70751	6.38261	6.34792	2.59556	5.73158	3.71402	0.603086	9.1196
TCGA-GN-A4U5	3.16712	0	8.98038	2.80278	8.03302	5.5386	7.66081	6.94564	3.42922	3.97451	8.34672	6.18993	3.16581	4.75803	4.48324	1.07318	9.1035
TCGA-EE-A17Z	0.720548	1	5.94302	1.10724	2.0742	4.7033	0.90832	0.95928	1.25247	2.76095	6.22757	5.081	0.890505	2.28099	0.693557	0.225781	7.17738
TCGA-EE-A2M7	2.40274	1	9.46385	2.59499	4.28126	5.41944	2.14307	2.35706	3.62326	4.12004	5.81798	4.64147	1.34832	2.29059	5.90652	0.312244	9.36701
TCGA-FR-A729	18.4	0	9.85975	3.77879	7.08137	6.75817	7.58432	7.70549	5.09162	3.23992	6.25057	6.66645	2.71396	4.55037	4.38039	0.753106	9.54767
TCGA-EE-A2MC	5.12603	1	7.78969	4.41671	7.53574	7.60811	6.98562	7.92732	6.04846	3.49766	6.72588	6.74439	2.65538	3.04488	3.75211	1.64262	10.1516
TCGA-D3-A2JF	5.1726	0	9.72484	3.48283	6.43482	6.52376	7.11469	6.51092	3.77518	3.70823	7.12979	6.00969	2.73758	5.5386	4.4204	0.991295	11.1665
TCGA-BF-AAP4	0.917808	0	6.47235	2.8811	6.43274	5.52348	4.60901	5.52453	3.31122	2.89635	8.92238	6.04693	1.44338	4.7306	2.5698	1.0149	7.68598
TCGA-ER-A19P	13.5068	1	8.82599	5.14751	8.39556	7.14574	7.75616	8.66911	6.66883	3.25184	6.35938	6.29189	4.67351	4.4283	6.27713	1.24868	9.13588
TCGA-EB-A4OY	2.67671	0	5.10767	1.6575	5.36091	5.69842	2.10474	2.66288	1.47502	2.48586	9.41513	5.14751	1.0345	3.54679	1.3847	1.03485	8.79948
TCGA-BF-A3DL	2.10685	0	5.13948	2.23167	3.78834	4.83281	1.57121	2.56951	1.69936	2.41599	8.9365	5.54669	0.832887	3.92083	1.00229	0.884139	9.90167
TCGA-EE-A181	2.81096	1	8.34672	3.78024	6.48726	6.34232	7.36856	7.55177	5.08595	3.67983	7.04116	6.77716	2.49285	4.46007	4.0329	1.0939	8.2898
TCGA-ER-A19W	12.3479	1	9.33636	5.43868	8.57634	7.9666	9.54767	9.46385	6.35351	3.73951	7.94282	6.69416	4.19453	4.99982	5.57685	1.73234	8.35944
TCGA-EB-A85I	0.991781	0	9.85975	3.07957	6.89809	5.26304	6.4535	5.10003	2.5623	3.43862	7.66081	6.53286	0.937352	4.98216	1.84034	1.86851	10.4541
TCGA-EE-A2GM	6.29041	0	6.33666	2.56625	3.81038	5.23762	3.47091	3.97064	2.94236	3.51804	7.23918	5.03517	1.117	3.29609	1.23837	0.596601	9.19635
TCGA-EE-A2GN	8.50959	1	8.2067	2.9081	3.62681	5.50116	3.99552	3.78206	3.08398	3.48784	5.98821	5.58709	1.1184	3.02123	1.57582	0.637809	8.9365
TCGA-BF-AAP7	0.871233	0	9.27406	3.78243	7.67339	6.82865	5.9696	6.11646	3.89059	3.46955	9.97052	6.07728	3.24152	4.05563	4.31918	0.860652	9.87992
TCGA-D3-A3C6	4.83836	1	9.35244	2.4472	4.19496	5.19841	8.09288	2.18743	2.31718	3.5499	8.31224	6.25765	0.833946	5.19247	1.64694	0.685441	9.07292
TCGA-DA-A3F3	0.873973	1	7.23503	2.59499	3.7887	5.10211	5.01317	4.6492	3.72083	3.37821	6.07257	6.03793	1.86143	4.75249	1.59284	0.56124	7.24763
TCGA-ER-A2NE	1.67945	1	7.13365	1.80264	1.97086	2.65625	0.633379	1.04866	0.8692	3.47398	7.27326	6.78548	0.301571	3.49491	1.33367	0.721516	8.21685
TCGA-DA-A1I2	14.7123	1	9.08851	2.68489	4.66499	6.30488	7.43608	6.6615	3.54854	4.78	6.80857	5.59322	1.51242	5.69054	2.28247	0.629813	8.86583
TCGA-ER-A195	2.95342	1	7.51393	4.3581	6.279	7.16174	5.70755	7.58432	5.59429	3.84411	7.15767	5.70866	2.63649	2.86226	3.91465	1.12814	9.1035
TCGA-D3-A3BZ	10.8932	0	6.54631	3.42047	6.78825	6.06501	5.29061	6.09253	4.52796	2.99681	7.3495	6.12125	1.93502	3.16515	5.08168	1.14191	10.4943
TCGA-XV-AAZW	1.07671	1	6.24166	1.26773	2.58893	4.75466	2.87955	2.38571	1.20558	2.7912	8.69442	5.57988	1.81797	4.02421	0.491843	0.714973	9.65179
TCGA-D3-A2J6	3.61918	1	9.3829	2.44871	6.00093	4.72179	4.50979	4.23567	2.31718	3.53276	7.60811	6.85513	1.36328	4.40259	1.73704	1.94047	7.3495
TCGA-BF-A3DN	1.96438	0	6.99958	1.93098	3.08017	5.32951	2.42952	2.30484	2.01247	3.18355	8.04963	6.85196	0.74644	3.86338	2.62403	0.43076	9.48095
TCGA-WE-AAA0	3.36712	0	9.46385	2.40778	4.12579	4.77148	4.72179	3.71073	3.13412	3.70969	8.70773	5.09796	1.48392	4.73766	4.08625	0.817873	9.16614
TCGA-XV-AAZY	1.10959	0	8.49663	2.66414	5.77635	5.3618	2.77974	3.61259	2.57888	2.94991	8.35944	4.81016	1.43355	3.89366	4.32053	0.359572	9.65179
TCGA-WE-A8K1	4.08767	0	10.6781	2.8411	7.13756	5.22129	6.88901	6.67899	3.55745	3.69017	8.2898	5.79675	2.53345	4.29888	3.26031	0.66456	7.29577
TCGA-ER-A3ET	7.75068	1	8.95055	4.67034	3.62236	8.33471	4.83405	3.7014	5.80937	3.83117	7.16174	7.34042	2.19708	4.22422	2.88617	1.01634	10.3075
TCGA-FS-A1ZT	4.43014	0	6.23453	3.54579	5.56674	5.6575	6.041	6.69163	4.84167	4.26705	6.47669	6.18826	2.26833	2.6071	4.32934	0.747626	7.34042
TCGA-D3-A51T	2.2411	0	8.25787	2.68828	5.17149	4.49562	4.88701	5.54568	2.73024	2.70445	8.04123	5.93632	1.7359	4.84459	3.07674	0.306947	9.65179
TCGA-EE-A29T	30.8274	0	8.44587	4.6019	6.25939	6.63466	4.25769	4.62756	5.37302	3.50816	6.72588	7.25181	3.10163	4.04179	3.41173	1.19053	10.125
TCGA-ER-A3EV	3.91507	1	6.33666	3.12311	5.62275	4.5872	3.34074	3.37093	2.92429	3.13412	7.50351	5.64977	0.853592	2.46382	1.58519	0.700171	8.0583
TCGA-XV-AB01	1.10411	0	7.11469	3.27821	5.40046	5.73503	2.65308	3.65324	2.61559	1.85226	7.46649	5.94859	1.50367	3.88795	3.2645	0.588366	9.94709
TCGA-WE-A8K6	1.49589	0	5.74556	3.04488	3.20828	7.50351	3.50766	1.34219	3.00558	3.20312	7.30032	5.42399	1.79055	3.67101	0.61414	0.88124	12.6454
TCGA-D3-A8GJ	20.1151	0	9.68833	3.83629	8.90775	7.36357	9.32097	8.77315	3.98887	3.34403	7.54668	6.52613	3.61474	5.50897	3.10473	0.810021	10.0437
TCGA-QB-A6FS	0.60274	0	8.26844	3.84555	6.75533	6.21546	3.79968	4.33334	3.53208	2.14612	8.50986	6.87963	2.47121	3.53722	4.59588	1.20484	9.18088
TCGA-GN-A266	0.843836	1	7.5789	4.91899	6.13737	8.2368	7.8534	7.36357	6.53951	4.12906	6.00242	6.31609	3.09283	2.86069	2.5599	1.47107	10.2736
TCGA-RP-A693	0.0273973	0	9.39877	3.95889	5.79068	7.3495	6.16338	6.39453	5.01383	3.84667	7.4314	5.88405	2.74002	4.15199	2.99837	1.29587	9.0101
TCGA-ER-A19L	10.9589	1	5.16202	3.23016	2.64329	5.66177	1.78733	1.4967	3.04898	4.29096	6.26462	5.58709	0.85733	3.89404	2.29604	0.606318	9.58129
TCGA-D3-A2JB	14	1	7.49298	2.78684	6.73123	6.39247	5.64317	6.38655	4.73873	3.54475	8.89291	6.0591	3.40128	4.07173	6.64942	0.795989	7.97478
TCGA-EE-A29E	5.31507	0	2.7708	1.7985	1.85315	3.95695	1.18787	1.54986	1.38547	2.92143	7.83102	5.98381	0.386368	3.82924	1.33897	1.48855	9.25821
TCGA-D3-A51E	14.5699	0	8.8523	3.57714	6.16013	5.99821	7.62545	7.63118	4.82994	3.46278	7.83865	7.00631	2.55541	4.57061	1.90219	1.10855	7.48764
TCGA-FS-A1ZE	3.87123	1	2.77321	1.83528	2.14729	3.22727	1.89453	3.11395	2.03452	2.8262	6.74976	4.793	0.58607	4.328	0.8657	0.497003	7.88224
TCGA-FS-A4F0	6.48493	0	10.629	1.10933	1.82873	2.13107	2.19319	1.55845	0.652866	5.59749	9.04156	5.9696	0.170335	6.4701	1.91533	0.56052	9.46385
TCGA-WE-A8ZX	2.98356	0	8.54966	2.95643	6.31795	5.86833	6.23283	6.72075	3.8207	3.31122	7.09592	6.26462	2.15598	2.6484	2.96016	0.788166	9.65179
TCGA-FR-A2OS	1.00822	1	5.82168	2.15265	1.91291	5.43315	0.765291	0.494435	2.91832	2.95831	6.9586	4.97638	0.72762	3.86971	0.690931	0.678385	9.08851
TCGA-D9-A1X3	1.50959	0	2.85275	2.01098	2.03121	3.72906	0.476439	0.367426	1.57631	3.28539	8.63045	4.58669	0.536734	4.50343	1.6097	0.228991	7.88224
TCGA-WE-A8ZN	4.91507	0	8.40832	3.23668	7.3495	6.72075	4.93328	5.51566	3.11267	2.75752	9.56424	4.80675	2.62863	3.85034	2.83365	1.4139	9.54767
TCGA-EB-A57M	1.29315	1	5.56268	3.00154	4.20334	5.90518	2.89324	2.28703	3.13932	2.61799	7.22672	5.7444	1.78846	4.40079	2.77635	1.10768	7.76948
TCGA-EE-A2MI	17.0548	1	7.56248	4.70984	5.34117	8.44587	5.35657	6.52613	5.83421	3.84628	5.76441	5.19171	3.13832	3.26549	2.01844	1.68148	10.4159
TCGA-WE-AA9Y	1.0137	0	5.66063	3.15717	4.17582	6.18015	0.779923	0.943222	3.47157	2.32252	6.27172	3.35704	1.80677	3.59001	4.37859	0.849358	9.36701
TCGA-D9-A1JX	0.591781	1	9.27406	3.74997	6.25938	6.69964	5.41853	5.84927	4.8517	3.2237	7.30897	6.89218	2.26714	3.79199	3.09409	0.932387	8.22683
TCGA-ER-A19A	6.47945	0	7.6925	6.18015	8.13853	9.32097	8.79948	9.58129	7.67339	3.8682	7.41164	7.54668	4.12948	3.95657	4.97388	2.36039	9.48095
TCGA-ER-A42K	1.07945	1	7.62545	2.25027	4.29096	5.00779	2.36672	2.52587	2.93053	3.7799	5.79927	6.98208	0.816005	2.43468	4.15533	0.877045	12.1231
TCGA-D3-A5GR	14.8603	0	7.71174	2.92519	5.39248	5.85312	5.54169	7.21417	5.09232	3.51086	5.76441	7.06269	3.1244	3.08303	5.40497	0.85655	10.4159
TCGA-WE-A8ZQ	5.26849	0	7.59023	1.69612	0.919721	4.9867	0.689086	0.942393	1.90894	2.42351	5.81556	6.09104	0.363645	2.69105	1.36268	0.518714	9.19635
TCGA-EE-A2MG	8.6	1	8.15848	3.47572	6.07889	6.185	5.3403	6.48726	5.40409	3.766	6.2	6.15039	3.14893	4.46995	7.29577	0.582286	9.79936
TCGA-QB-AA9O	1.50411	1	5.32187	3.15236	6.87034	6.51092	4.89972	5.91733	3.52969	2.66076	8.0583	4.73873	2.87118	4.25509	1.80881	0.582137	9.61682
TCGA-ER-A194	3.70959	1	6.08202	3.05991	6.75817	5.6542	3.82517	4.52744	2.65264	2.39495	8.56253	4.80901	1.87524	4.42412	2.87149	0.49925	9.76173
TCGA-ER-A19S	4.12329	0	9.05722	4.63426	8.58981	7.45102	7.93477	9.39877	5.9696	3.82478	6.52613	7.09972	3.91542	4.29577	3.79968	1.56379	9.08851
TCGA-D3-A3ML	1.15616	1	7.86789	1.3147	1.76389	2.11191	1.78166	1.43514	0.791886	3.8979	5.17827	4.94333	0.34932	4.49325	1.21901	0.778233	7.30458
TCGA-FS-A1ZB	4.07123	1	8.25787	4.80958	4.26279	7.14181	3.66241	3.91163	4.88342	3.85373	8.22683	5.55377	3.05153	3.33387	2.98601	1.26448	9.56424
TCGA-EE-A2MM	13.9918	1	9.83855	3.15782	3.38988	6.01416	5.94859	3.5359	3.93726	5.20066	8.26844	6.8403	1.13992	4.34016	1.57037	1.22177	7.58432
TCGA-EE-A3JE	4.27945	0	8.82599	5.14018	8.87908	6.44102	9.51314	7.70549	5.67145	3.57266	7.99939	6.80269	3.86562	5.5225	4.72124	1.26962	9.33636
TCGA-GF-A4EO	1.61918	0	8.18702	4.8022	7.78292	7.74339	7.45102	8.99563	6.13737	3.25122	6.53498	7.31344	4.61415	3.95657	4.17414	1.48094	8.70773
TCGA-FS-A4F9	2.83562	0	4.38593	1.45534	2.0565	3.61474	1.912	3.09725	1.54314	2.88174	6.94891	6.26462	0.713629	2.5177	1.083	0.310594	7.20183
TCGA-WE-A8ZY	4.12603	1	10.1814	2.37487	3.04331	4.77312	2.91957	2.62253	2.21753	4.8517	7.77609	6.7284	0.542188	4.78396	2.58406	0.377548	8.12876
TCGA-FR-A44A	14.5178	0	8.34672	5.30773	9.21138	7.3736	9.08851	10.0189	6.2171	3.61826	5.48455	7.29577	4.16742	5.18946	3.86338	1.79942	9.4973
TCGA-W3-AA1R	9.25753	1	7.24338	2.02919	5.1234	4.61162	4.78118	4.50442	2.10163	2.99187	7.74339	6.02901	2.06731	3.91427	1.66322	0.368591	7.78969
TCGA-EB-A299	1.03562	0	6.31232	1.70166	4.75638	6.25406	5.05757	5.00647	2.12958	2.77912	6.65656	5.23841	4.41718	4.15407	1.36427	1.13307	10.2121
TCGA-EE-A2ML	18.0548	1	8.82599	3.259	5.50307	6.62527	4.85985	5.00845	4.14993	3.3378	7.23918	8.35944	2.14488	4.68451	3.79712	1.05696	9.54767
TCGA-YD-A9TA	4.09863	0	6.58758	3.67385	5.41853	6.71811	5.11256	5.98679	4.60752	3.50315	5.74556	5.206	2.50083	1.57211	2.00407	0.882344	9.79936
TCGA-D3-A1Q3	1.38904	1	6.87344	2.75322	4.58311	5.23841	3.73119	6.40056	3.98536	3.62254	8.92238	3.05715	2.38178	4.56416	4.97765	1.10459	8.78625
TCGA-D9-A1JW	0.30411	1	8.87908	4.00056	6.54631	5.67934	5.04325	6.279	4.56962	3.09283	7.64322	5.3863	2.61923	4.82645	4.64661	1.457	7.78292
TCGA-EE-A2GC	5.61918	0	8.35944	4.3813	6.42848	6.60147	8.86583	7.24338	5.02306	3.57021	6.89219	5.81182	3.34241	4.24692	2.62128	1.15654	8.21685
TCGA-FR-A7U8	2.32055	0	9.4973	2.59124	2.12663	4.65917	2.34086	2.07207	1.86893	4.06525	7.58432	5.78343	0.678796	4.0911	1.13136	0.416142	8.31224
TCGA-EE-A29A	5.27945	1	7.3828	2.23255	1.92309	4.57806	1.30469	1.5698	2.35648	4.31432	5.70183	1.89892	0.593222	2.84842	1.22305	2.11065	9.85975
TCGA-W3-AA1W	18.263	0	9.66998	4.62292	9.46385	8.0583	8.2368	9.3829	5.98679	4.25509	7.23918	7.69856	3.68729	5.65308	5.16709	1.88888	9.16614
TCGA-FS-A1ZA	2.30959	1	4.67768	2.74002	4.30195	5.26543	4.82118	6.32371	4.03014	3.56092	6.65179	3.08398	1.74493	2.67042	2.1232	1.09978	10.2736
TCGA-EB-A44N	0.561644	1	7.50351	1.70373	4.61934	5.00779	5.19922	5.0727	2.66533	2.9651	7.39195	5.92958	4.59736	3.41303	3.51322	1.4161	7.99939
TCGA-FS-A1Z4	2.33973	1	8.07535	3.75869	6.13092	5.82168	6.29374	6.31795	5.07409	4.54531	5.26942	6.23111	2.75079	4.16248	6.34038	1.08529	9.54767
TCGA-D9-A6EA	2.09863	0	8.83904	2.39316	3.59482	4.8858	3.93308	2.87833	2.3824	3.9021	8.45867	5.57988	0.600813	4.03574	1.03355	0.84299	9.27406
TCGA-EE-A3JI	12.7342	1	8.99563	3.40407	3.07177	6.73653	4.49515	2.02206	3.34531	5.53964	6.53498	6.46603	1.55787	4.85405	3.0115	0.520976	7.26461
TCGA-ER-A199	0.764384	1	8.56253	3.85816	6.51092	6.4956	4.988	5.52453	5.21058	2.92894	6.91685	7.82403	1.99862	3.91812	6.38064	1.25066	9.63461
TCGA-DA-A1IC	5.67397	1	6.67653	2.3519	4.35629	4.55681	3.09381	4.40444	2.53586	3.38693	6.89219	5.32951	1.74551	3.01936	2.01521	0.840333	8.2067
TCGA-D3-A5GN	11.3123	0	8.2898	2.62036	5.66614	4.96236	6.36328	6.94891	3.46278	3.2334	6.70745	6.47885	1.81503	3.49491	2.32371	0.993766	9.65179
TCGA-3N-A9WB	1.41918	1	7.14976	1.45621	1.97535	3.01745	1.08948	0.76108	0.632014	3.21319	9.4486	4.56026	0.828556	4.66499	0.888775	0.838979	8.10199
TCGA-EB-A553	0.619178	0	6.85196	2.12631	5.79556	4.7575	2.73052	5.5284	1.97562	2.98349	9.15014	4.66876	1.99175	2.87089	2.81139	0.166934	10.5823
TCGA-EB-A5UL	2.4411	0	7.0627	1.94822	6.20678	4.42368	5.14676	6.21025	2.56202	3.5499	7.64904	5.85953	2.03153	3.32856	3.59206	0.87125	8.61704
TCGA-FS-A4F4	5.55616	1	7.03403	3.36463	5.89836	6.1784	3.12502	3.86338	2.9654	2.48955	8.92238	5.11113	1.99537	4.28348	2.63256	0.398989	9.78044
TCGA-EB-A3XB	2.18082	0	6.75817	3.04297	4.58412	5.63658	2.93333	3.22019	3.15655	2.75937	8.40832	6.65179	1.79082	3.97337	2.01844	0.437998	8.81294
TCGA-DA-A95X	6.16164	0	7.596	3.91852	4.42272	6.17674	5.12483	6.25406	4.7913	4.05563	5.50505	7.91921	1.94736	4.28216	1.44777	1.12724	9.21138
TCGA-D3-A1Q8	2.33973	1	8.04123	4.51126	3.30737	8.27939	2.36491	2.2238	5.1678	3.29578	7.23918	6.57605	2.12931	1.7897	3.63558	0.799425	10.7829
TCGA-HR-A2OH	5.49041	1	9.72484	5.18426	8.74606	7.8534	8.98038	9.4973	6.73914	3.22148	7.76948	7.70549	3.51287	5.41484	4.80391	1.9025	9.39877
TCGA-D9-A3Z1	1.28219	1	6.18993	4.41584	6.53074	6.40465	5.76081	5.92011	5.12917	3.5403	7.80309	6.04846	3.48887	3.21188	3.21513	1.59889	6.52613
TCGA-D9-A4Z6	1.53699	1	5.64645	1.2259	2.73729	3.37754	1.99671	1.59116	1.21453	4.15077	7.11469	5.21441	0.280633	2.79272	0.317203	0.816553	8.47128
TCGA-EE-A29S	5.10685	1	8.06666	3.08715	5.20366	5.30932	3.64754	4.80901	3.65185	3.22854	6.77167	7.26461	1.6134	3.89289	2.74557	0.877249	10.1516
TCGA-EB-A82B	1.06849	0	8.82599	3.23372	5.90249	6.59212	5.27498	5.01579	3.48418	3.50074	7.47166	6.82865	1.90633	4.17372	2.07505	0.819088	7.88224
TCGA-EB-A85J	0.986301	0	7.49298	3.12089	7.27326	6.57398	7.45102	5.58909	4.41081	2.65839	7.87492	6.13251	2.37669	3.95388	3.41808	0.890505	7.27786
TCGA-D3-A2JL	14.2986	0	8.39556	3.0543	7.80309	6.20678	5.29462	6.69964	3.33319	3.88908	7.22281	6.16172	3.39977	5.0549	3.61647	0.843187	8.90775
TCGA-D3-A3MV	3.77534	0	7.98248	2.85913	2.34241	5.94167	2.42137	0.633047	3.19249	3.80446	6.79402	6.13581	0.82716	2.30605	1.68148	0.362341	8.87908
TCGA-ER-A19B	8.2	1	2.6929	2.00046	3.3144	4.72893	1.48997	2.1013	2.22835	3.5331	6.48726	8.26844	0.624201	2.88016	4.39472	0.51326	9.4486
TCGA-EE-A3AG	3.46575	1	3.75283	1.80058	2.42501	4.74588	1.79614	1.28014	2.45809	2.78313	5.90518	5.86333	0.55371	1.23609	0.37545	0.242748	9.72484
TCGA-EE-A2GR	3.56438	1	3.05684	0.959668	1.58833	2.06131	2.31145	2.48925	1.04841	3.1508	8.50986	3.99359	0.188671	3.74274	0.381217	0.399099	7.46155
TCGA-D3-A2JO	5.50685	0	8.2898	4.51469	8.04963	7.04823	6.59445	7.73716	5.74792	3.62929	6.45763	6.13897	3.16232	2.39286	3.24897	1.65067	9.61682
TCGA-BF-AAOU	1.30411	0	8.52357	2.57798	3.86933	5.97943	1.62389	2.01998	2.37669	2.84019	7.84629	5.49045	0.981502	4.96685	2.1803	0.740716	11.0897
TCGA-DA-A3F8	3.6137	0	9.59881	4.73166	9.0101	7.47671	8.79948	9.30576	5.71776	3.69592	7.46649	7.79637	3.48688	5.48167	4.98868	1.72856	9.54767
TCGA-FR-A728	1.59726	0	9.85975	3.87456	6.69416	6.22406	6.14057	4.92759	4.17246	2.81417	8.11037	7.62545	1.97803	4.5796	3.27106	1.12058	11.1665
TCGA-EE-A3JA	4.43288	1	5.47217	4.20844	5.92415	4.4204	6.20678	6.12593	5.23134	3.26647	6.19663	5.56874	3.17087	5.34714	3.02627	0.527237	7.16174
TCGA-FS-A1YW	18.0767	1	4.65233	2.36763	3.1162	4.44558	2.77048	3.1193	2.9713	3.18199	4.86103	6.1916	1.10068	3.37353	2.99127	0.516104	7.34042
TCGA-FS-A1ZG	0.808219	1	4.81016	2.56683	2.86008	4.12496	2.17911	2.41656	2.50919	3.73013	9.43193	4.12538	0.683189	2.74095	1.53434	0.921265	5.60912
TCGA-EE-A2M6	10.7726	0	5.37032	3.82216	3.56368	7.17333	4.33286	3.70678	5.12701	3.00527	6.31416	7.83102	2.29242	1.29281	1.65973	0.866281	7.99123
TCGA-DA-A1HV	6.38082	0	9.36701	4.05601	6.7799	6.8673	7.12598	7.89717	5.27098	3.71003	6.60857	6.55774	3.49359	4.43626	3.47639	0.975279	9.59881
TCGA-D3-A5GU	10.4329	0	8.45867	3.48953	5.77285	6.48726	5.66932	5.89706	3.84374	3.42578	7.60811	5.18875	2.26563	5.1678	2.4813	0.442006	8.54966
TCGA-D9-A6EG	1.91233	1	4.35988	2.08686	1.78705	4.40351	1.00601	0.882803	1.82307	3.21577	7.9666	5.16202	0.680531	2.57737	1.01895	0.451155	5.9696
TCGA-BF-A5EO	1.92603	0	8.24738	2.72995	5.04458	6.02601	3.34043	3.92701	2.55903	2.45263	8.96526	6.28268	0.962751	3.60216	1.81679	0.641759	10.3428
TCGA-EB-A6R0	1.66575	1	10.2736	2.73513	6.97205	4.5424	9.87992	6.50657	3.64718	4.9041	7.98248	6.07257	1.28172	6.39865	2.39769	0.503958	7.55736
TCGA-Z2-A8RT	2.29863	0	8.77314	3.19472	5.42032	5.77516	5.68271	6.35163	4.23789	4.07132	6.87344	6.01115	1.94971	5.11617	3.49972	0.997007	9.02556
TCGA-EB-A6L9	3.03836	0	8.04963	3.0118	6.35744	5.51566	5.09232	5.69842	4.08865	2.83427	6.45966	5.63339	2.56292	4.40627	6.6615	1.10562	8.60301
TCGA-ER-A2NG	4.08219	1	7.53574	4.30151	8.82599	6.55774	7.12979	7.55177	5.79927	3.81811	7.20572	7.66687	2.65897	4.28656	3.15205	1.78223	9.74223
TCGA-FS-A1YX	4.04932	1	6.47885	3.16484	3.259	6.41628	4.33604	2.5822	3.61647	3.60042	7.60811	7.04461	1.05601	3.29057	1.89252	0.750831	10.8992
TCGA-D3-A8GD	1.96712	0	9.18088	3.92275	8.27939	6.73385	6.73914	8.43363	5.40229	4.17626	6.64942	5.90518	4.3795	5.57279	5.73853	1.04275	9.3829
TCGA-ER-A19E	1.08493	1	5.33946	2.70688	3.99007	5.64763	3.47538	4.21654	3.5004	3.34434	5.04652	5.01579	1.36268	1.03838	1.47533	0.650005	9.27406
TCGA-EB-A3HV	0.106849	0	7.81695	3.48688	3.93882	5.98821	0.784268	1.33367	3.10005	2.62951	6.98562	5.58398	3.34434	4.12046	1.88471	1.74969	10.4159
TCGA-EB-A5SE	1.09863	1	8.0583	1.37283	3.43962	3.65429	3.51119	3.19375	1.50658	3.10507	8.92238	5.64421	1.16047	3.35108	1.00017	0.567629	6.75817
TCGA-FR-A8YD	3.02192	1	6.1196	2.3845	3.76639	5.01119	1.46925	2.50263	2.53681	2.03452	7.55177	5.59647	1.14679	3.51219	1.50337	0.569449	8.07535
TCGA-WE-A8K4	1.68219	0	9.90167	2.90317	8.10199	5.08524	6.68925	5.80812	3.06617	4.20041	7.64322	5.21366	2.26983	5.26145	2.43588	2.08985	6.77438
TCGA-EE-A29L	0.216438	1	6.89219	0.734883	1.55701	1.77983	1.42884	1.57239	0.599589	4.04293	8.31224	4.52154	0.159884	2.91434	1.19451	1.01705	6.16013
TCGA-FS-A4F5	2.39452	1	7.42642	2.02857	2.52802	4.41993	5.22669	5.07342	2.386	3.02872	7.80309	6.22582	0.854251	4.5872	1.37364	0.304886	9.24196

## Sheet: additional file 4
gene	HR	HR.95L	HR.95H	pvalue
BST2	0.863827	0.80764	0.923924	1.99175e-05
C3AR1	0.791781	0.705239	0.888942	7.70565e-05
CCL5	0.860815	0.806536	0.918748	6.47945e-06
CD14	0.844397	0.77306	0.922318	0.000172941
CXCL10	0.851113	0.802131	0.903085	9.77794e-08
CXCL9	0.870617	0.824397	0.919429	6.41919e-07
CYBB	0.819068	0.750814	0.893526	6.92651e-06
EIF2AK2	0.713835	0.567128	0.898491	0.00408088
EMP3	1.27546	1.11414	1.46014	0.000421012
ICAM1	0.842278	0.766017	0.926131	0.00039297
IL18	0.798134	0.706096	0.902168	0.000309908
RTP4	0.86353	0.774351	0.962979	0.00833336
SELL	0.868222	0.793913	0.949487	0.00196559
SLC31A2	0.754304	0.571642	0.995333	0.0462585
TIMP1	0.85445	0.770694	0.947308	0.00280491
